# Supplementary material
Source: PubMed Central journal article supplement (PMC2617716)

## Synthesis of the ABC- and D- Ring Systems of the Indole Alkaloid Ambiguine G

Aroop Chandra, Rajesh Viswanathan, and Jeffrey N. Johnston\*

Department of Chemistry, Vanderbilt University  
2301 Vanderbilt Place, Nashville, TN 37235-1822

### Experimental Section

Unless otherwise noted, all reactions were carried out under argon or nitrogen using flame or oven dried glassware. Tetrahydrofuran (THF) and dichloromethane (CH<sub>2</sub>Cl<sub>2</sub>) were dried by passage through a column of activated alumina as described by Grubbs.<sup>1</sup> Molecular sieves (spheres, 4Å) were activated at 400 °C and then stored at room temperature in an air-tight container.

Flash column chromatography was performed using Sorbent Technologies 40-63 mm, pore size 60 Å silica gel with solvent systems indicated. Analytical thin layer column chromatography was performed using Sorbent Technologies 250 mm glass-backed UV254 silica gel plates that were visualized by fluorescence upon 250 nm radiation and/or the by use of ceric ammonium molybdate or potassium permanganate. Solvent removal was effected by rotary evaporation under aspirator vacuum (~ 25-40 mmHg).

IR spectra were recorded on a Nicolet Avatar 360 spectrophotometer and are reported in wavenumbers (cm<sup>-1</sup>). Liquids and oils were analyzed as neat films on a NaCl plate (transmission), whereas solids were applied to a diamond plate (ATR). Proton nuclear magnetic resonance spectra were recorded on either a Varian INOVA-400 (400 MHz), VXR-400 (400 MHz) or Bruker DRX-500 (500 MHz) spectrometers and are recorded in parts per million from residual undeuterated chloroform and are reported as follows: chemical shift [multiplicity (s = singlet, d = doublet, t = triplet, q = quartet, qu = quintet, m = multiplet), coupling constant(s) in hertz, integration]. <sup>13</sup>C NMR data were recorded on a Bruker DRX-500 spectrometer. High resolution mass spectrometry (HRMS) was performed by the Indiana University Mass Spectrometry Facility.

Ratios of diastereomers and isomeric products were measured directly from integration of <sup>1</sup>H NMR absorptions of protons common to the components. Precision was checked by varying

---

<sup>1</sup> Pangborn, A. B.; Giardello, M.A.; Grubbs, R. H.; Rosen, R. K.; Timmers, F. J. *Organometallics* **1996**, *15*, 1518-1520.

the relaxation delay for measurements on the same compound. Literature procedure was followed for the synthesis of diazomethane,<sup>2</sup> glycine *tert*-butyl ester,<sup>3</sup>  $\beta$ -chloro methacrolein **8**<sup>4</sup> and Cohen's diene **9**.<sup>5</sup>

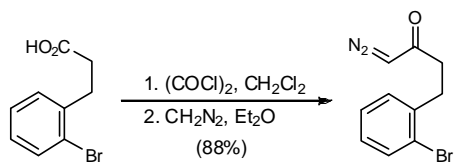

**4-(2-Bromophenyl)-1-diazobutan-2-one (3).** To a 0 °C solution of 3-(2-bromophenyl)propanoic acid (8.00 g, 34.9 mmol) in dichloromethane (0.5 M), was added oxalyl chloride (5.90 mL, 69.8 mmol) over 5 minutes. The solution was slowly warmed to room temperature and stirred until complete conversion was achieved, as evidenced by <sup>1</sup>H NMR. The solvent was removed *in vacuo* to give the title compound, which was used without further purification.

The acid chloride (8.50 g, 34.6 mmol) in diethyl ether (80 mL) was added dropwise over 20 min to an ethereal diazomethane solution [prepared from *N*-methyl-*N*-nitrosoourea (14.24 g, 138.2 mmol)], at -40 °C while stirring under nitrogen. The solution was allowed to warm to room temperature, and it was then stirred for an additional 6 h. The ether and residual diazomethane were evaporated under reduced pressure at room temperature, using a rotary evaporator fitted with an acetic acid trap. The resulting yellow residue was purified by flash column chromatography (SiO<sub>2</sub>, 15% ethyl acetate in hexanes) to afford the desired product as a yellow oil (7.76 g, 88%). *R*<sub>f</sub> = 0.27 (20% EtOAc/hexanes); IR (film) 3087, 2101, 1641 cm<sup>-1</sup>; <sup>1</sup>H NMR (500 MHz, CDCl<sub>3</sub>)  $\delta$  7.51 (d, *J* = 8.0 Hz, 1H), 7.22 (m, 2H), 7.06 (m, 1H), 5.27 (s, 1H), 3.05 (t, *J* = 4.5 Hz, 2H), 2.62 (s, 2H); <sup>13</sup>C NMR (125 MHz, CDCl<sub>3</sub>) ppm 193.5, 139.8, 132.8, 130.6, 128.0, 127.61, 124.2, 54.5, 40.5, 31.4; HRMS (EI): Exact mass calcd for C<sub>10</sub>H<sub>9</sub>BrO [M]<sup>+</sup> 223.9837. Found 223.9839.

<sup>2</sup> Arndt, F.; Amstutz, E. D.; Myers, R.R. *Org Synth.* **1935**, 2, 461. Noller, C.R.; Bergsteinsson, I. *Org. Synth.* **1935**, 2, 165.

<sup>3</sup> Siebum, A.H.G.; Woo, W.S.; Lugtenburg, J. *Eur. J. Org. Chem.* **2003**, 23, 4664.

<sup>4</sup> Mooradian, A.; Cloke, J. B. *J. Am. Chem. Soc.* **1946**, 68, 785. Hatch, L. F.; Russ, J. J.; Gordon, L. B. *J. Am. Chem. Soc.* **1947**, 69, 2614. Williard, P.G.; Grab, L.A.; Delaszlo, S. E. *J. Org. Chem.* **1983**, 48, 1123.

<sup>5</sup> Cohen, T.; Ruffner, R. J.; Shull, D. W.; Fogel, E. R.; Falck, J. R. *Org. Synth.* **1980**, 59, 202.

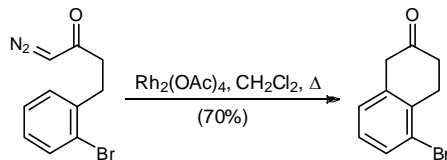

**5-Bromo-3,4-dihydronaphthalen-2(1H)-one (S1).** The  $\alpha$ -diazo ketone (7.70 g, 30.4 mmol) in  $\text{CH}_2\text{Cl}_2$  (200 mL) was added dropwise over 1 h to a refluxing solution of rhodium(II) acetate (80 mg, 180  $\mu\text{mol}$ ) in  $\text{CH}_2\text{Cl}_2$  (2 L). The reaction was monitored by TLC and was complete once the diazoketone had been added. The solution was cooled, washed with water and satd aq  $\text{NaHCO}_3$ , dried, and concentrated to 500 mL solution. This solution was treated with trifluoroacetic acid (3 mL) and the solution was stirred for 4 h at room temperature, washed with water and satd aq  $\text{NaHCO}_3$ , and dried. After solvent removal, the red residue was purified by flash column chromatography ( $\text{SiO}_2$ , 5-10% ethyl acetate in hexanes) to afford the desired product as a viscous oil (4.80 g, 70%).  $R_f = 0.30$  (10% EtOAc/hexanes); IR (film) 2960, 2923, 1705, 1393, 1301  $\text{cm}^{-1}$ ;  $^1\text{H}$  NMR (500 MHz,  $\text{CDCl}_3$ )  $\delta$  7.45 (dd,  $J = 6.0, 3.0$  Hz, 1H), 7.04 (m, 2H), 3.57 (s, 2H), 3.20 (t,  $J = 6.5$  Hz, 2H), 2.53 (t,  $J = 6.5$  Hz, 2H);  $^{13}\text{C}$  NMR (125 MHz,  $\text{CDCl}_3$ ) ppm 211.1, 136.1, 135.3, 130.9, 128.1, 127.5, 123.7, 45.0, 37.6, 28.0; HRMS (EI): Exact mass calcd for  $\text{C}_{10}\text{H}_9\text{BrO}$  [ $\text{M}$ ] $^+$  223.9837. Found 223.9840.

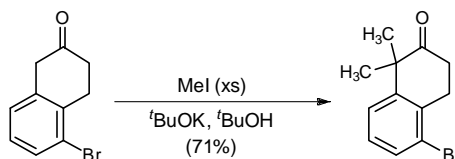

**5-Bromo-1,1-dimethyl-3,4-dihydronaphthalen-2(1H)-one (S2).** To a 0  $^\circ\text{C}$  solution of  $\beta$ -tetralone (800 mg, 4.36 mmol) in *tert*-butanol (7 mL), was added potassium *tert*-butoxide (480 mg, 4.28 mmol) in small portions over 10 minutes. The reaction was stirred for 10 minutes at 0  $^\circ\text{C}$ , and methyl iodide (357  $\mu\text{L}$ , 7.14 mmol) in THF (1 mL) was added to the solution. The reaction was allowed to warm to room temperature and the reaction stirred for 2 h at room temperature. MeI (268  $\mu\text{L}$ , 5.36 mmol) in THF (1 mL) was added to the solution and the reaction stirred for another 6 h at room temperature. The reaction was quenched with satd aq  $\text{NH}_4\text{Cl}$ , the layers were separated, and the aqueous layer was extracted with  $\text{Et}_2\text{O}$ . The combined organic

layers were washed with water, dried, filtered, and concentrated. The resulting red residue was purified by flash column chromatography (SiO<sub>2</sub>, 5-10% ethyl acetate in hexanes) to afford the dimethylated product as a colorless oil (634 mg, 71% yield).  $R_f = 0.34$  (10% EtOAc/hexanes); IR (film) 2971, 2929, 2867, 1716, 1560, 1461, 1301 cm<sup>-1</sup>; <sup>1</sup>H NMR (500 MHz, CDCl<sub>3</sub>)  $\delta$  7.45 (dd,  $J = 8.0, 0.5$  Hz, 1H), 7.31 (d,  $J = 8.0$  Hz, 1H), 7.13 (t,  $J = 8.0$  Hz, 1H), 3.22 (t,  $J = 7.0$  Hz, 2H), 2.70 (t,  $J = 7.0$  Hz, 2H), 1.43 (s, 6H); <sup>13</sup>C NMR (125 MHz, CDCl<sub>3</sub>) ppm 213.7, 146.1, 134.6, 130.7, 128.3, 125.6, 124.4, 47.7, 36.5, 28.7, 27.2; HRMS (EI): Exact mass calcd for C<sub>12</sub>H<sub>13</sub>BrO [M]<sup>+</sup> 252.0150. Found 252.0144.

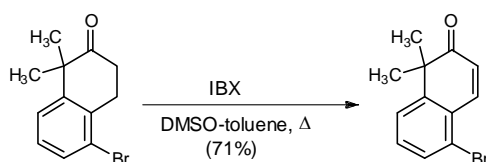

**5-Bromo-1,1-dimethylnaphthalen-2(1H)-one (4).** To a solution of 5-bromo-1,1-dimethyl-3,4-dihydronaphthalen-2(1H)-one (2.62 g, 10.3 mmol) in toluene/DMSO (2:1, 140 mL) was added IBX (11.56 g, 41.30 mmol) and the mixture was stirred at 85 °C for 16 h. The reaction mixture was then cooled to room temperature, diluted with Et<sub>2</sub>O, and washed with 5% aq NaHCO<sub>3</sub>, H<sub>2</sub>O, and brine, and then dried, filtered, and concentrated. The resulting yellow residue was purified by flash column chromatography (SiO<sub>2</sub>, 5-10% ethyl acetate in hexanes) to afford the desired product as a yellow oil (1.92 g, 65%).  $R_f = 0.32$  (10% EtOAc/hexanes); IR (film) 2973, 2928, 2867, 1664, 1613, 1583, 1551, 1458, 1438, 1385, 1291, 1216, 1197 cm<sup>-1</sup>; <sup>1</sup>H NMR (500 MHz, CDCl<sub>3</sub>)  $\delta$  7.91 (d,  $J = 10.0$  Hz, 1H), 7.45 (d,  $J = 8.0$  Hz, 1H), 7.36 (d,  $J = 8.0$  Hz, 1H), 7.19 (t,  $J = 8.0$  Hz, 1H), 6.18 (d,  $J = 10.0$  Hz, 1H), 1.41 (s, 6H); <sup>13</sup>C NMR (125 MHz, CDCl<sub>3</sub>) ppm 203.3, 149.8, 141.9, 131.0, 130.7, 127.6, 125.5 (2C), 124.6, 47.3, 27.6; HRMS (EI): Exact mass calcd for C<sub>12</sub>H<sub>11</sub>BrO [M]<sup>+</sup> 249.9993. Found 249.9998.

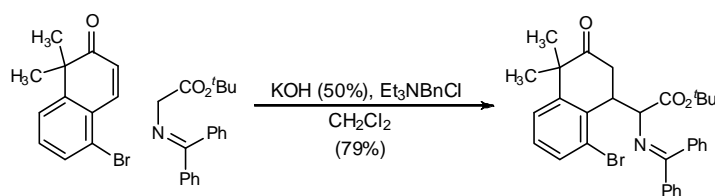

**tert-Butyl 2-(8-bromo-4,4-dimethyl-3-oxo-1,2,3,4-tetrahydronaphthalen-1-yl)-2-(diphenylmethyleneamino)acetate (6).** The enone (50.0 mg, 199  $\mu\text{mol}$ ), Schiff base (88.0 mg, 119  $\mu\text{mol}$ ), and benzyl triethyl ammonium chloride (13.6 mg, 59.6  $\mu\text{mol}$ ) were dissolved in  $\text{CH}_2\text{Cl}_2$  (1 mL). 50% KOH (140  $\mu\text{L}$ ) was then added and the mixture was stirred vigorously for 8 h. The reaction mixture was diluted with  $\text{CH}_2\text{Cl}_2$ , and the organic layer was separated, washed with water, dried ( $\text{NaSO}_4$ ), filtered, and concentrated. Flash column chromatography ( $\text{SiO}_2$ , 5-15% ether in hexanes) of the resulting oil furnished the desired Michael adduct as a white solid (85.4 mg, 79%) in addition to *ca.* 6.1 mg of the enone (*ca.* 12%). A single diastereomer was detected by  $^1\text{H}$  NMR. mp 172-174  $^\circ\text{C}$ ;  $R_f = 0.20$  (20%  $\text{Et}_2\text{O}$ /hexanes); IR (film) 3059, 2976, 2918, 2849, 1719, 1623, 1447, 1368, 1266, 1152  $\text{cm}^{-1}$ ;  $^1\text{H}$  NMR (500 MHz,  $\text{CDCl}_3$ )  $\delta$  7.47 (d,  $J = 8.0$  Hz, 1H), 7.41 (d,  $J = 7.0$  Hz, 2H), 7.32 (m, 2H), 7.28-7.21 (m, 5H), 7.15 (t,  $J = 8.0$  Hz, 1H), 6.36 (d,  $J = 5.0$  Hz, 2H), 4.50 (d,  $J = 2.0$  Hz, 1H), 4.41 (m, 1H), 2.95 (m, 2H), 1.43 (s, 9H), 1.33 (s, 3H), 1.12 (s, 3H);  $^{13}\text{C}$  NMR (125 MHz,  $\text{CDCl}_3$ ) ppm 210.9, 172.5, 169.1, 148.5, 138.8, 136.2, 133.6, 130.9, 130.4, 130.1, 129.5, 128.7, 128.2 (2C), 127.7, 127.1, 126.9, 124.8, 81.7, 67.8, 47.0, 44.1, 38.2, 33.5, 29.7, 28.1, 25.7; HRMS (ESI): Exact mass calcd for  $\text{C}_{31}\text{H}_{32}\text{BrNO}_3\text{Na}$   $[\text{M}+\text{Na}]^+$  568.1463. Found 568.1440.

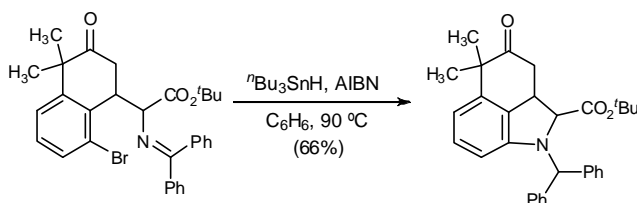

**tert-Butyl 1-benzhydryl-5,5-dimethyl-4-oxo-1,2,2a,3,4,5-hexahydrobenzo[*cd*]indole-2-carboxylate (S3).** To a refluxing (90  $^\circ\text{C}$ ) benzene (12 mL) solution of the ketimine (65.0 mg, 119  $\mu\text{mol}$ ) and  $^n\text{Bu}_3\text{SnH}$  (34.1  $\mu\text{L}$ , 125  $\mu\text{mol}$ ) was added AIBN (23.6 mg, 143  $\mu\text{mol}$ ) and  $^n\text{Bu}_3\text{SnH}$  (34.1  $\mu\text{L}$ , 125  $\mu\text{mol}$ ) dissolved separately in benzene (1 mL) via a syringe pump over 4 h. The solution was stirred for an additional 6 h at 90  $^\circ\text{C}$  and the solvent was removed in *vacuo*. The residue was treated with a 1:1 (v/v) solution of  $\text{Et}_2\text{O}$  (5 mL) and satd aq KF,<sup>6</sup> and the mixture was stirred vigorously until a white solid precipitated. The organic layer was washed with water, dried ( $\text{NaSO}_4$ ), filtered, and concentrated. The resulting white residue was purified

<sup>6</sup> Complete saturation by KF is necessary.

by flash column chromatography (SiO<sub>2</sub>, 15% ether in hexanes) to afford the product as a viscous oil (36 mg, 66%) in addition to *ca.* 8.5 mg of the aryl bromide (*ca.* 13%). The indoline was characterized as a 5:3 ratio of diastereomers (<sup>1</sup>H NMR). *R<sub>f</sub>* = 0.33 (20% Et<sub>2</sub>O/hexanes); IR (film) 2975, 2927, 2855, 1730, 1711, 1596, 1454, 1367, 1276, 1238, 1217, 1150 cm<sup>-1</sup>; <sup>1</sup>H NMR (500 MHz, CDCl<sub>3</sub>) δ 7.55 (d, *J* = 7.5 Hz, 2H), 7.50 (d, *J* = 7.5 Hz, 2H), 7.40-7.36 (m, 4H), 7.32-7.20 (m, 12H), 6.96-6.90 (m, 2H), 6.63 (d, *J* = 7.5 Hz, 1H), 6.59 (d, *J* = 7.5 Hz, 1H), 5.96 (d, *J* = 7.5 Hz, 1H), 5.78 (d, *J* = 7.5 Hz, 1H), 5.59 (s, 1H), 5.55 (s, 1H), 4.20 (d, *J* = 9.5 Hz, 1H), 3.94 (d, *J* = 9.5 Hz, 1H), 3.89 (ddd, *J* = 11.0, 11.0, 5.5 Hz, 1H), 3.61 (ddd, *J* = 11.0, 11.0, 5.5 Hz, 1H), 2.91 (dd, *J* = 15.5, 5.5 Hz, 1H), 2.75 (dd, *J* = 15.5, 5.5 Hz, 1H), 2.52 (dd, *J* = 16.0, 12.0 Hz, 1H), 2.43 (dd, *J* = 16.0, 12.0 Hz, 1H), 1.45 (s, 3H), 1.39 (s, 3H), 1.38 (s, 9H), 1.36 (s, 3H), 1.32 (s, 3H), 1.27 (s, 9H); <sup>13</sup>C NMR (125 MHz, CDCl<sub>3</sub>) ppm 214.2, 213.5, 171.6, 169.3, 149.7, 149.6, 142.6, 140.5 (2C), 139.8, 139.5, 139.0, 130.4, 129.5, 129.4, 129.1, 128.8, 128.7, 128.4, 128.3, 127.6 (2C), 127.4, 127.0, 126.7, 126.4, 125.9, 114.8, 114.7, 107.7, 107.6, 81.8, 81.6, 74.3, 70.7, 67.9, 67.1, 46.9, 46.5, 42.9, 40.9, 40.0, 38.5, 28.0 (2C), 27.3, 26.9, 26.3, 24.6; HRMS (ESI): Exact mass calcd for C<sub>31</sub>H<sub>33</sub>NO<sub>3</sub>Na [M+Na]<sup>+</sup> 490.2358. Found 490.2376.

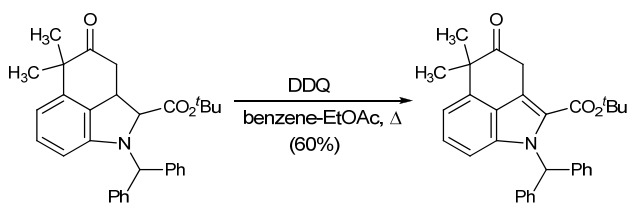

***tert*-Butyl 2-benzhydryl-6,6-dimethyl-7-oxo-2,6,7,8-tetrahydrobenzo[*cd*]indole-1-carboxylate (7).** A solution of indoline (100 mg, 214 μmol) and DDQ (51.0 mg, 225 μmol) in EtOAc-benzene (1:2, 2 mL) was stirred for 8 hours at 60 °C. The reaction mixture was then cooled to room temperature, diluted with EtOAc, and washed with satd aq NaHCO<sub>3</sub>, dried, filtered, and concentrated. The resulting yellow residue was purified by flash column chromatography (SiO<sub>2</sub>, 5-15% ether in hexanes) to afford the desired product as a viscous oil (59.8 mg, 60%) in addition to *ca.* 19.6 mg of the indoline (*ca.* 20%). *R<sub>f</sub>* = 0.44 (20% Et<sub>2</sub>O/hexanes); IR (film) 2973, 2925, 1696, 1655, 1604, 1450, 1396, 1368, 1324, 1211, 1171, 1132 cm<sup>-1</sup>; <sup>1</sup>H NMR (500 MHz, CDCl<sub>3</sub>) δ 8.29 (s, 1H), 7.33-7.28 (m, 6H), 7.23-7.21 (m, 4H), 7.02 (dd, *J* = 12.0, 6.5 Hz, 1H), 6.94 (d, *J* = 6.0 Hz, 1H), 6.50 (d, *J* = 7.0 Hz, 1H), 4.06 (s, 2H), 1.57 (s, 9H), 1.45 (s, 6H); <sup>13</sup>C NMR (125 MHz, CDCl<sub>3</sub>) ppm 211.1, 161.6, 139.9, 139.8, 136.7,

128.4 (2C), 127.4, 126.3, 123.8, 123.6, 118.5, 114.3, 112.2, 81.9, 62.4, 48.1, 38.2, 28.5, 26.3; HRMS (EI): Exact mass calcd for  $C_{31}H_{30}BrNO_3$   $[M]^+$  465.2304. Found 465.2298.

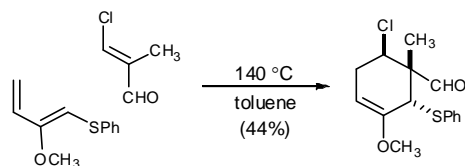

**6-Chloro-3-methoxy-1-methyl-2-phenylsulfanyl-cyclohex-3-enecarbaldehyde (10).** Cohen's diene<sup>7</sup> (82.3 mg, 428  $\mu$ mol),  $\beta$ -chloro- $\alpha$ -methyl acrolein<sup>4</sup> (504  $\mu$ L, 7.14 mmol), *tert*-butyl-4-hydroxy-5-methyl phenylsulfide (12.8 mg, 35.7  $\mu$ mol), hydroquinone (3.93 mg, 35.7  $\mu$ mol), Hünig's base (375  $\mu$ L, 2.14 mmol), and dry toluene (1.40 mL) were added to a silanized sealed tube. The contents were heated to 140 °C for 40 hours. The cooled reaction mixture was then concentrated to a residue that was purified by flash chromatography (3% ethyl acetate in hexanes) to furnish the desired *endo* adduct as a yellow oil (56.0 mg, 44%). About 10% of the regioisomeric adduct was also isolated.  $R_f$  = 0.1 (3% EtOAc/hexanes); IR (film) 3062, 1727  $cm^{-1}$ ; <sup>1</sup>H NMR (400 MHz,  $CDCl_3$ )  $\delta$  9.89 (s, 1H), 7.44 (dd,  $J$  = 8.2, 1.8 Hz, 2H), 7.33-7.27 (m, 3H), 4.39 (dd,  $J$  = 10.5, 6.2 Hz, 1H), 4.64 (dd,  $J$  = 4.8, 2.8 Hz, 1H), 3.60 (s, 3H), 3.55 (s, 1H), 2.79 (dt,  $J$  = 17.2, 5.6 Hz, 1H), 2.42 (ddd,  $J$  = 16.8, 10.4, 1.6 Hz, 1H), 1.24 (s, 3H); <sup>13</sup>C NMR (100 MHz,  $CDCl_3$ ) ppm 202.7, 152.6, 135.0, 132.4, 129.1, 127.9, 93.1, 91.8, 56.4, 56.4, 55.0, 52.5, 30.8, 13.6; HRMS (EI): Exact mass calcd for  $C_{15}H_{17}ClO_2S$   $[M]^+$  296.0638. Found 296.0647.

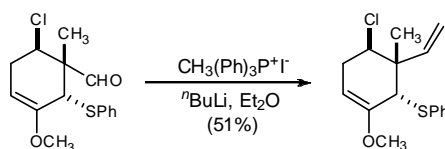

**(5-Chloro-2-methoxy-6-methyl-6-vinyl-cyclohex-2-enylsulfanyl)-benzene(S4).**

Methyltriphenylphosphonium iodide (549 mg, 1.36 mmol) was dissolved in  $Et_2O$  (7 mL) and cooled to  $-78$  °C. *n*-Butyllithium (490  $\mu$ L, 1.18 mmol) was added, followed by addition of the aldehyde (268 mg, 905  $\mu$ mol) as a solution in  $Et_2O$  (2.0 mL). After stirring for 45 min at  $-78$  °C,

<sup>7</sup> Cohen, T.; Ruffner, R. J.; Shull, D. W.; Fogel, E. R. *Org. Synth.* **1980**, 59, 202.

the reaction mixture was allowed to warm to room temperature and was stirred overnight. The solution was diluted with ether, washed with water, dried, and concentrated to a residue that was purified by flash chromatography (1% ethyl acetate in hexanes) to furnish the product as a yellow oil (136 mg, 51% yield).  $R_f = 0.5$  (2% EtOAc/hexanes); IR (film) 3076, 1716  $\text{cm}^{-1}$ ;  $^1\text{H}$  NMR (400 MHz,  $\text{CDCl}_3$ )  $\delta$  7.48 (dd,  $J = 8.4, 1.6$  Hz, 2H), 7.30-7.22 (m, 3H), 6.23 (dd,  $J = 14.0, 10.4$  Hz, 1H), 5.14 (dd,  $J = 14.4, 2.8$  Hz, 2H), 4.59 (t,  $J = 7.6$  Hz, 1H), 4.35 (dd,  $J = 9.2, 6.0$  Hz, 1H), 3.55 (s, 3H), 3.52 (s, 1H), 2.76 (dt,  $J = 17.6, 4.8$  Hz, 1H), 2.42 (ddd,  $J = 13.2, 9.2, 0.8$  Hz, 1H), 1.30 (s, 3H);  $^{13}\text{C}$  NMR (100 MHz,  $\text{CDCl}_3$ ) ppm 153.7, 142.4, 137.1, 131.9, 128.6, 126.9, 115.4, 92.5, 61.7, 59.5, 54.8, 45.8, 31.6, 17.1; HRMS (EI): Exact mass calcd for  $\text{C}_{16}\text{H}_{19}\text{ClOS}$   $[\text{M}]^+$  294.0845. Found 294.0846.

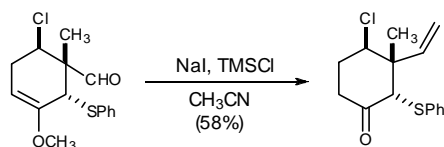

**4-Chloro-3-methyl-2-phenylsulfanyl-3-vinyl-cyclohexanone (11).** Using the procedure described by Cohen,<sup>8</sup> the enol ether (58.7 mg, 199  $\mu\text{mol}$ ) and NaI (29.8 mg, 199  $\mu\text{mol}$ ) were combined in  $\text{CH}_3\text{CN}$  (4 ml). Trimethylsilyl chloride (25.2  $\mu\text{L}$ , 199  $\mu\text{mol}$ ) was added dropwise to this mixture at room temperature causing the solution to turn orange. After stirring for 15 min, the mixture was diluted with  $\text{CH}_2\text{Cl}_2$  (5 mL) and was purified by filtration through a plug of silica gel-alumina to furnish the product as a yellow oil (32.3 mg, 58% yield).  $R_f = 0.1$  (10% EtOAc/hexanes); IR (film) 3059, 1719  $\text{cm}^{-1}$ ;  $^1\text{H}$  NMR (400 MHz,  $\text{CDCl}_3$ )  $\delta$  7.38 (d,  $J = 6.8$  Hz, 2H), 7.31-7.27 (m, 3H), 6.00 (dd,  $J = 17.6, 10.8$  Hz, 1H), 5.33 (dd,  $J = 10.8, 5.6$  Hz, 1H), 5.26 (dd,  $J = 17.6, 5.2$  Hz, 1H), 4.48 (dd,  $J = 8.4, 4.0$  Hz, 1H), 3.80 (s, 1H), 3.07-2.99 (m 1H), 2.59-2.52 (m, 1H), 2.50-2.43 (m, 1H), 2.26-2.17 (m, 1H), 1.40 (s, 3H);  $^{13}\text{C}$  NMR (100 MHz,  $\text{CDCl}_3$ ) ppm 204.2, 140.3, 134.3, 131.8, 129.1, 127.7, 116.8, 65.7, 63.5, 49.6, 35.7, 31.0, 20.6; HRMS (EI): Exact mass calcd for  $\text{C}_{15}\text{H}_{17}\text{ClOS}$   $[\text{M}]^+$  280.0689. Found 280.0674.

<sup>8</sup> Kosarych, Z.; Cohen, T. *Tetrahedron Lett.* **1980**, *21*, 3959-3962.



<sup>1</sup>H NMR

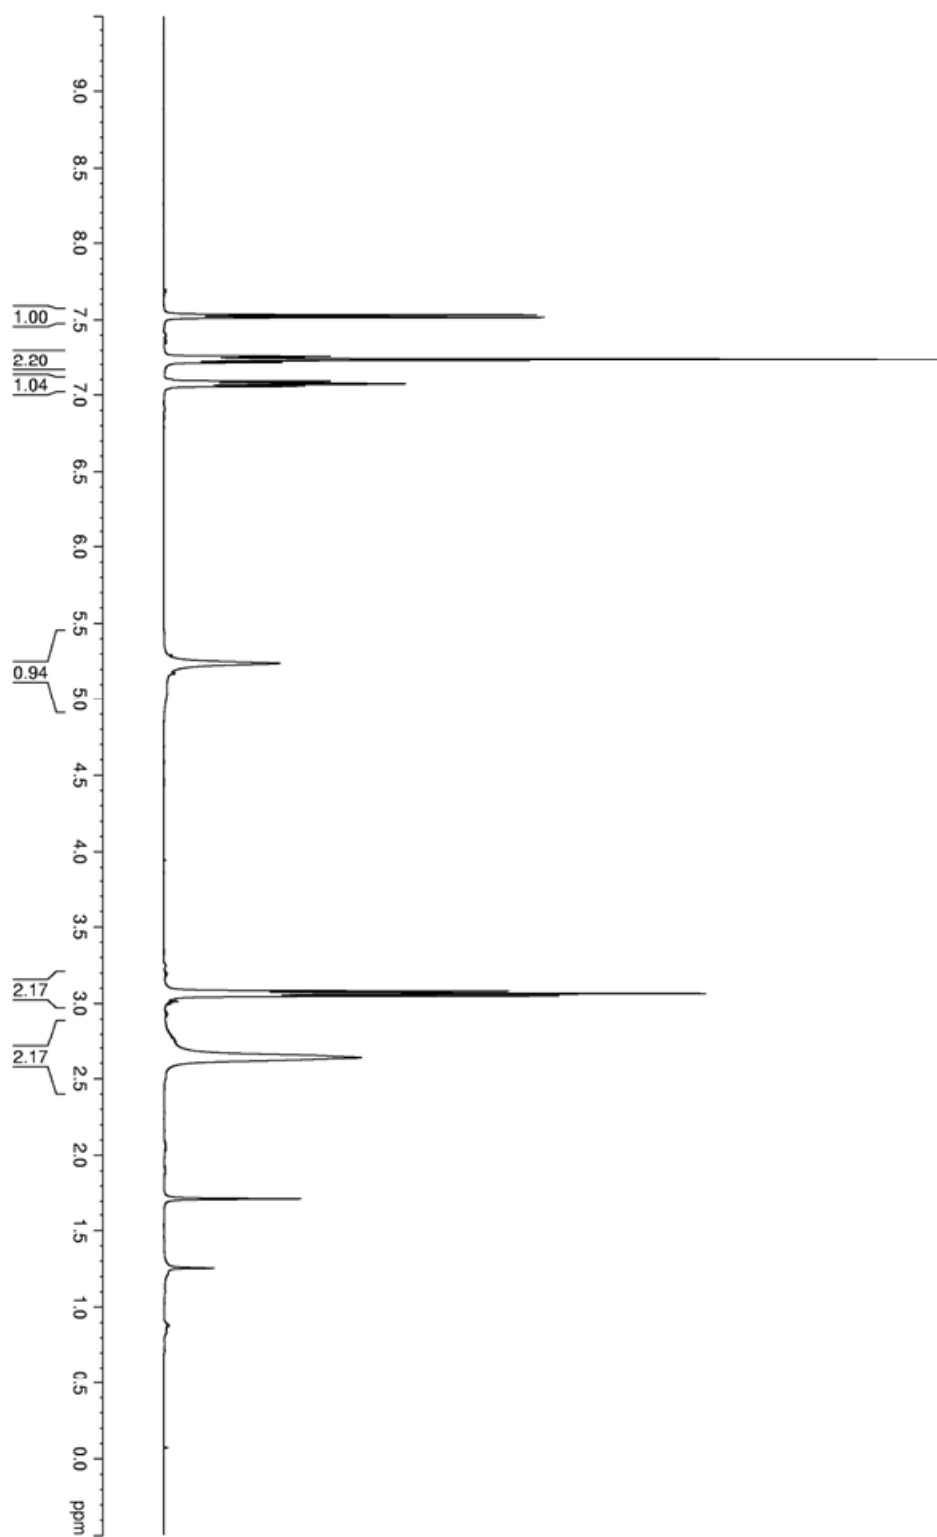

<sup>13</sup>C NMR

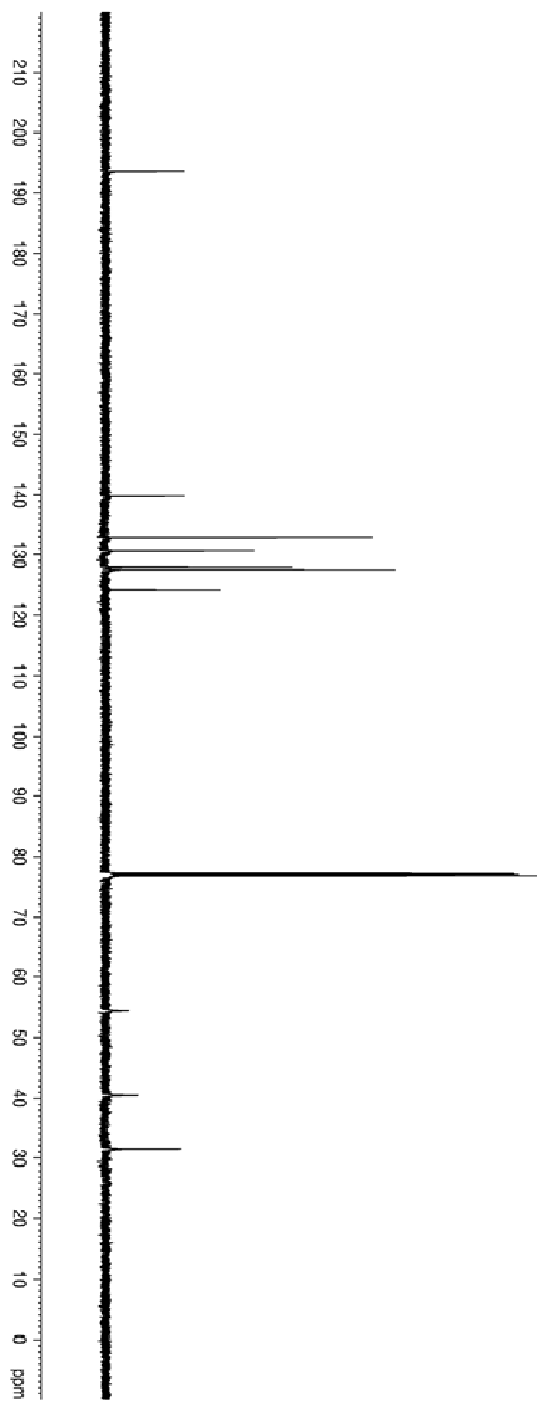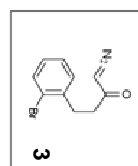

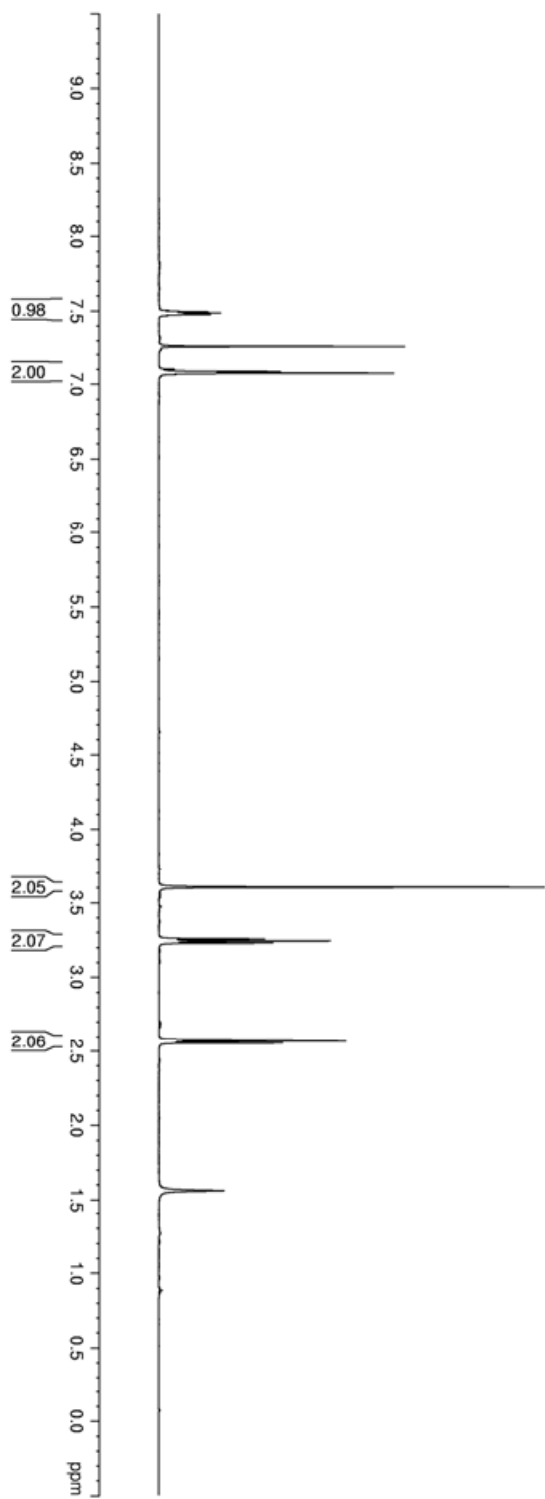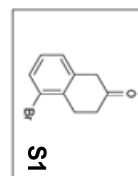

<sup>13</sup>C NMR

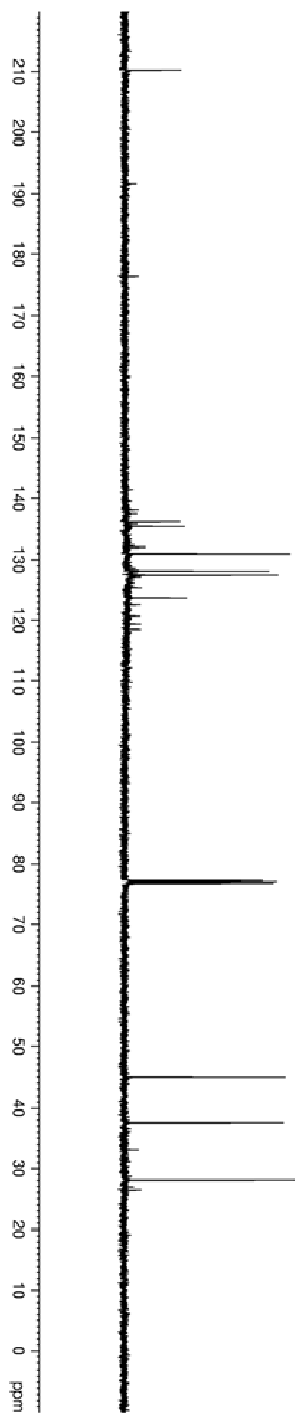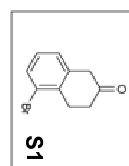

<sup>1</sup>H NMR

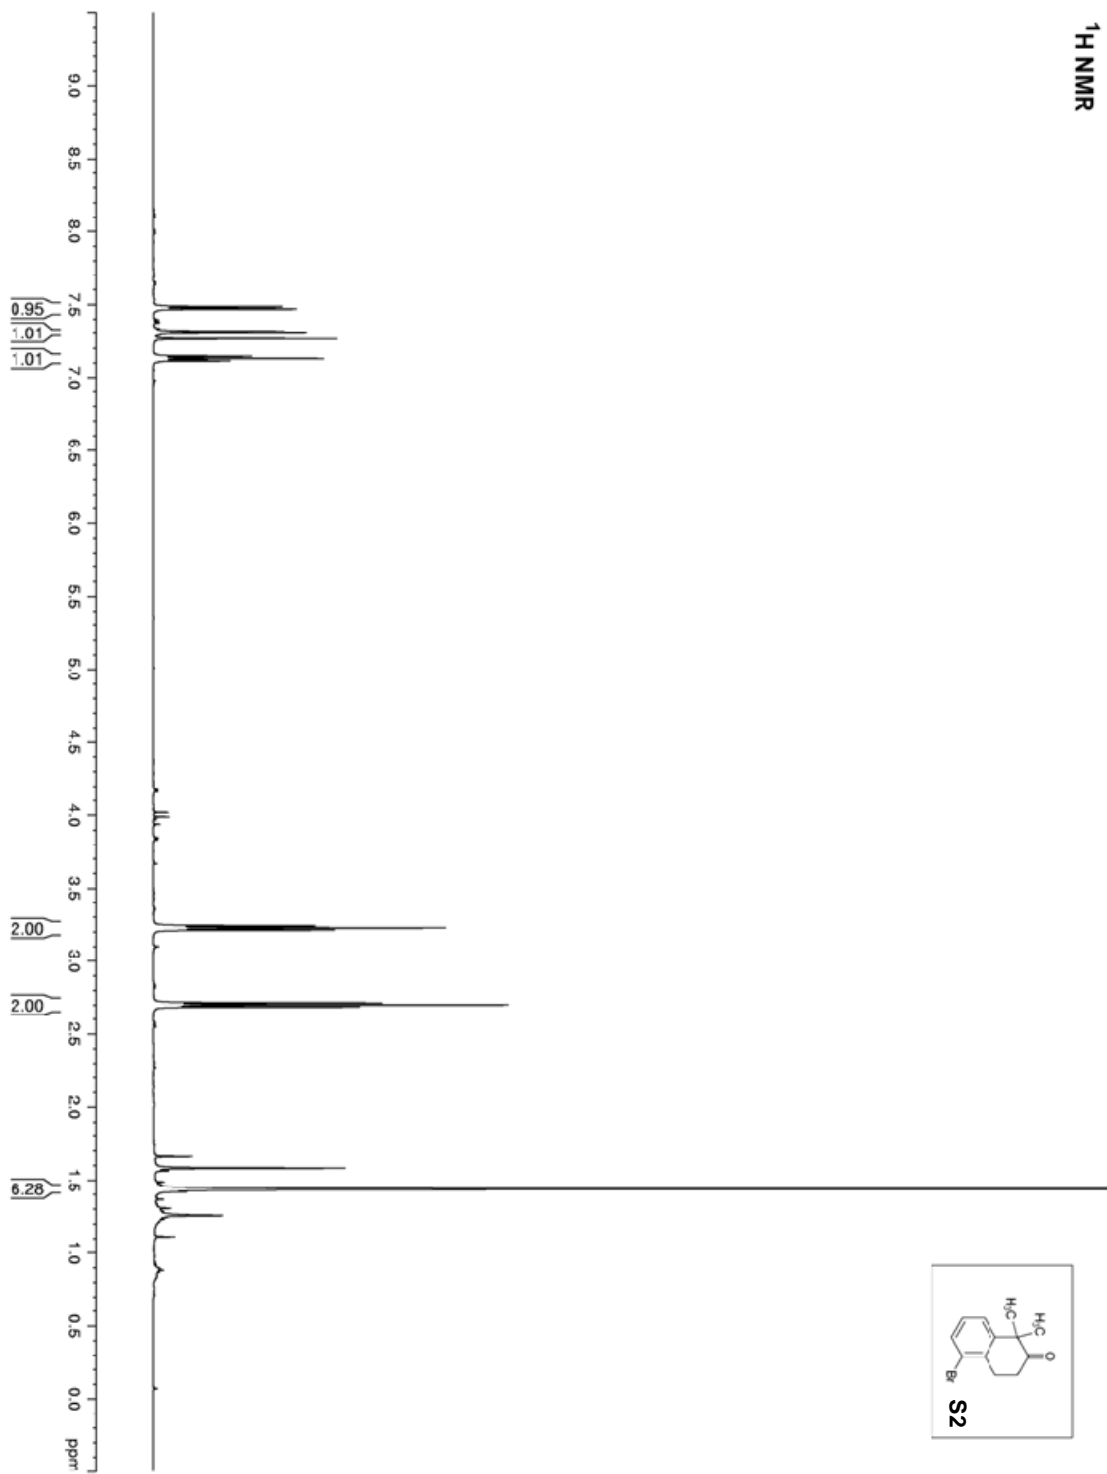

<sup>13</sup>C NMR

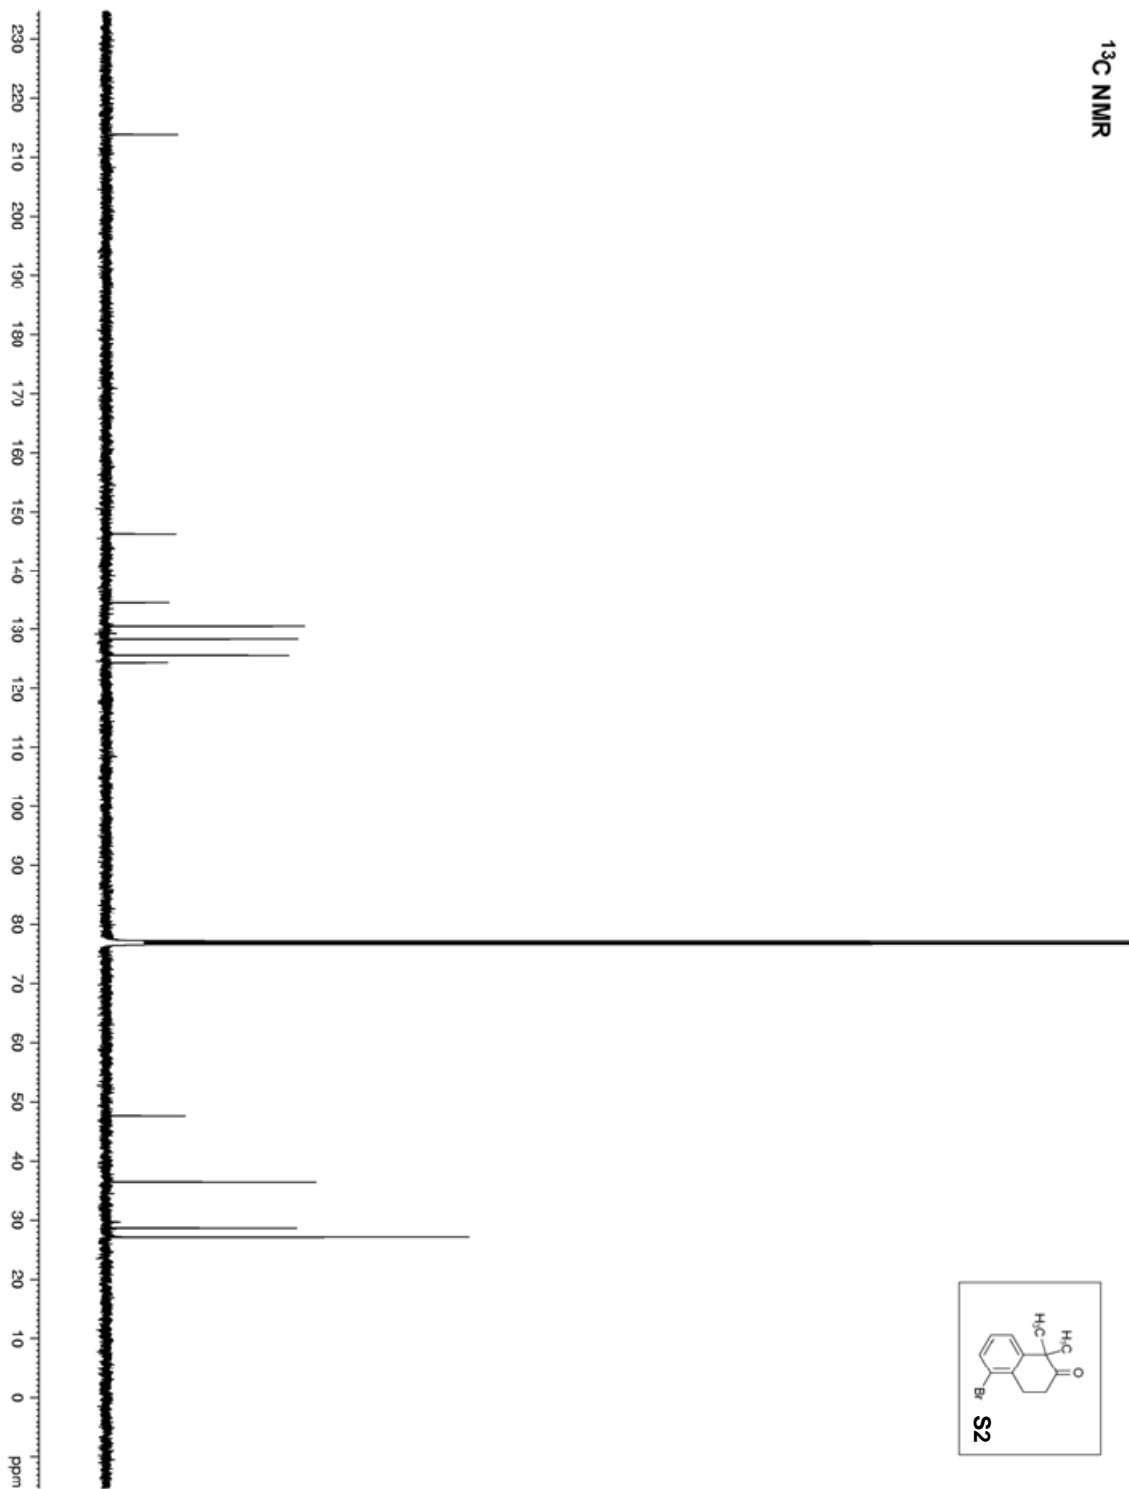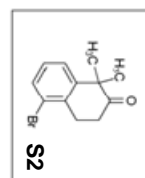

<sup>1</sup>H NMR

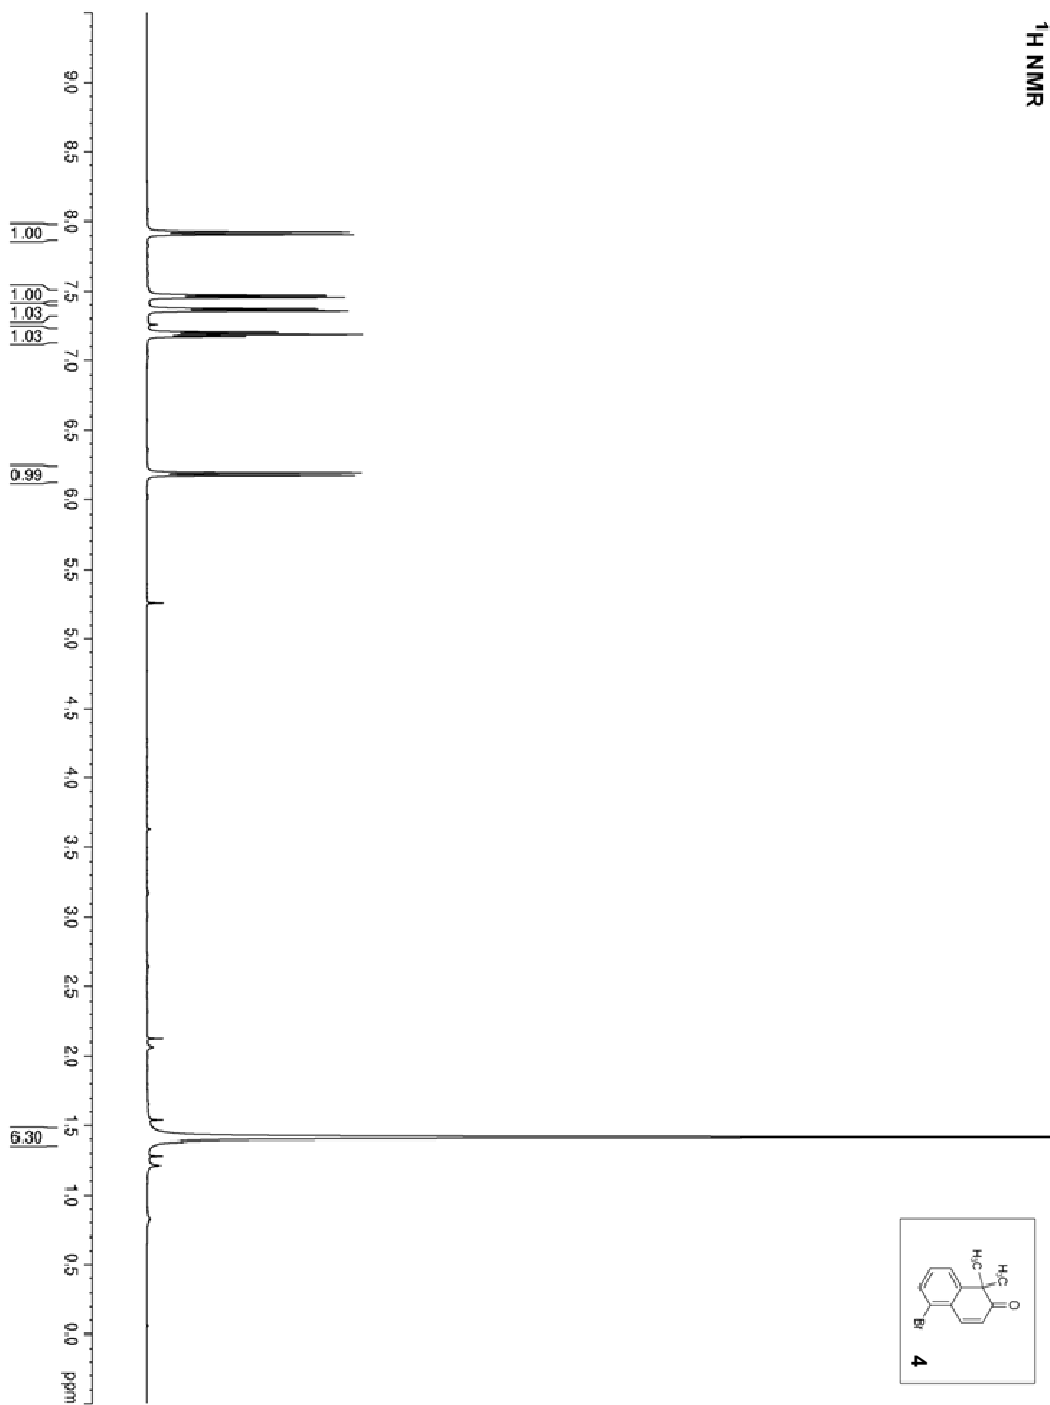

<sup>13</sup>C NMR

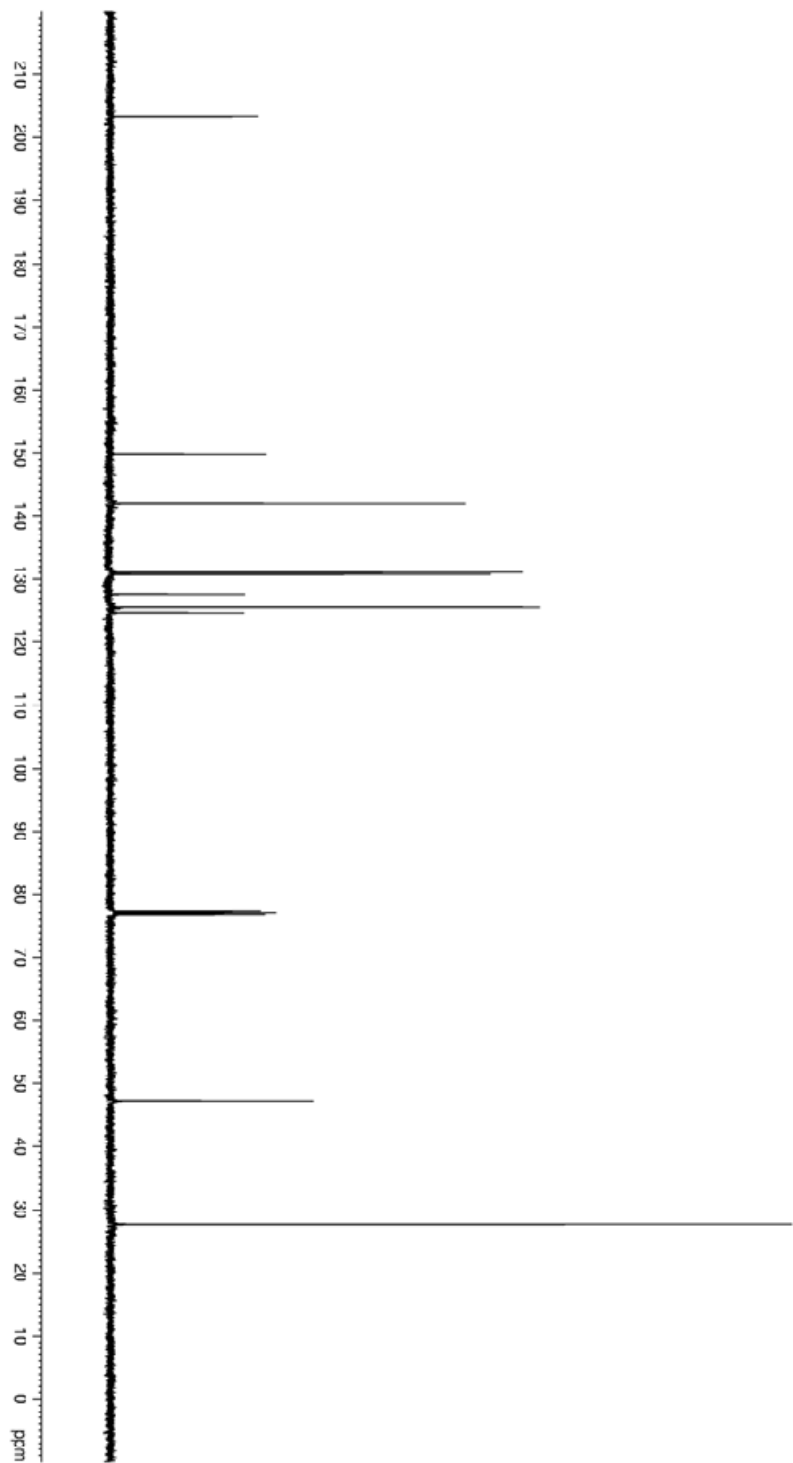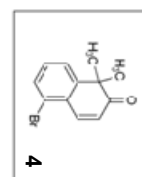



<sup>1</sup>H NMR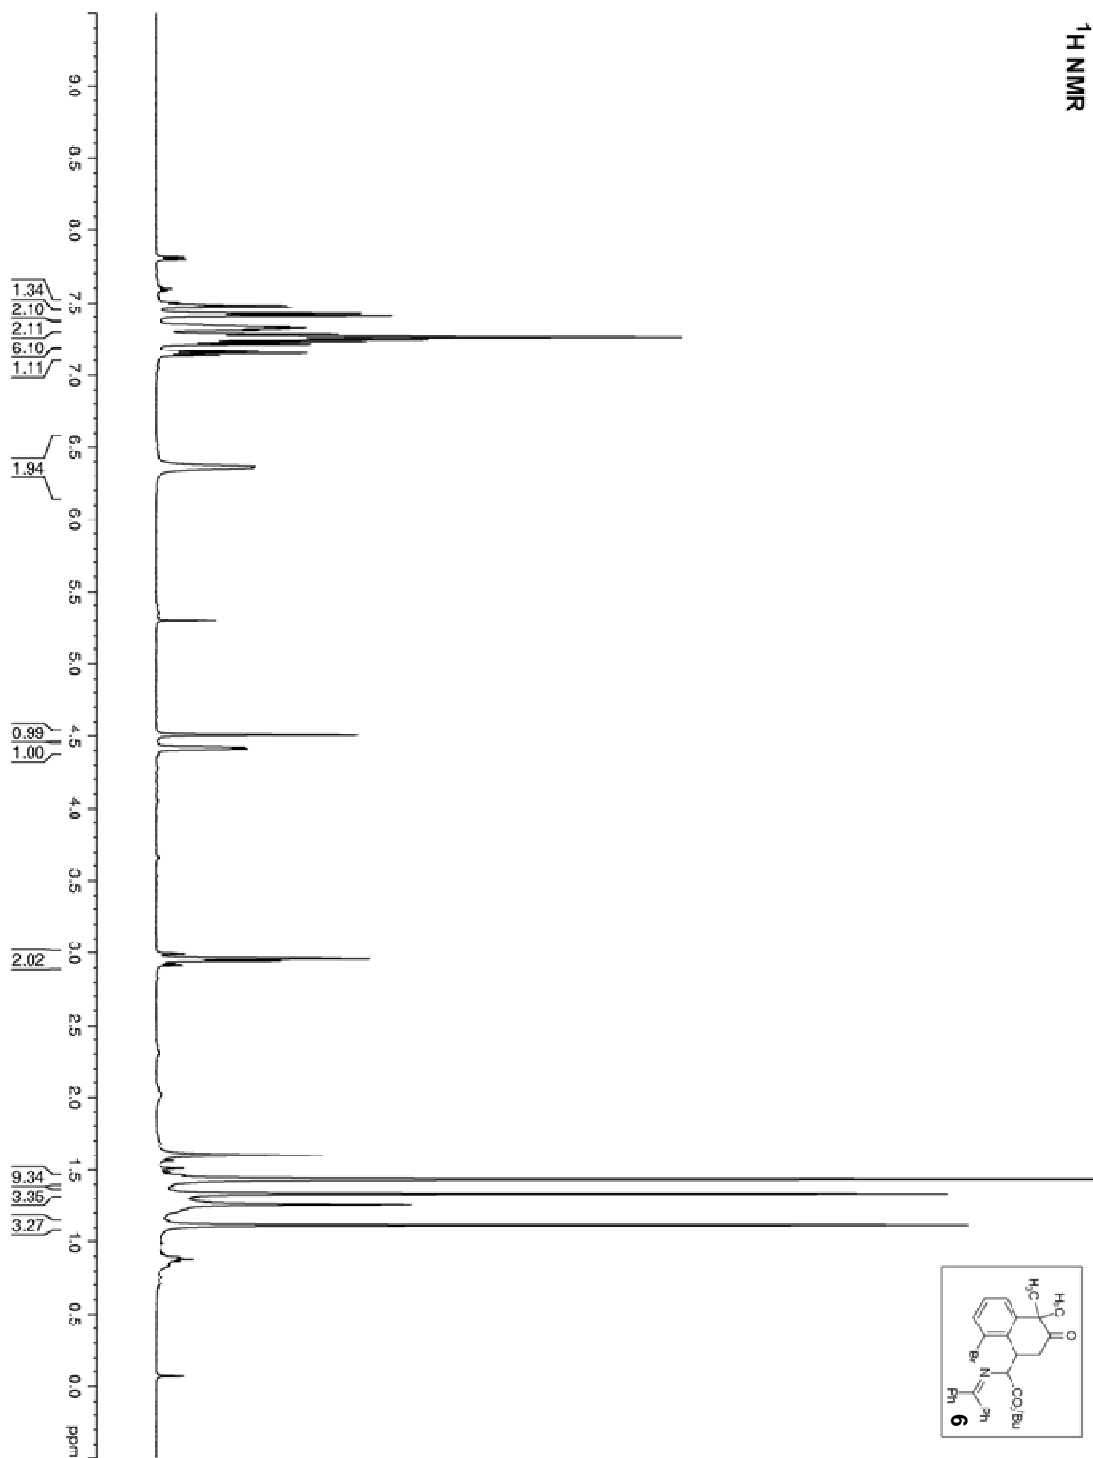

<sup>13</sup>C NMR

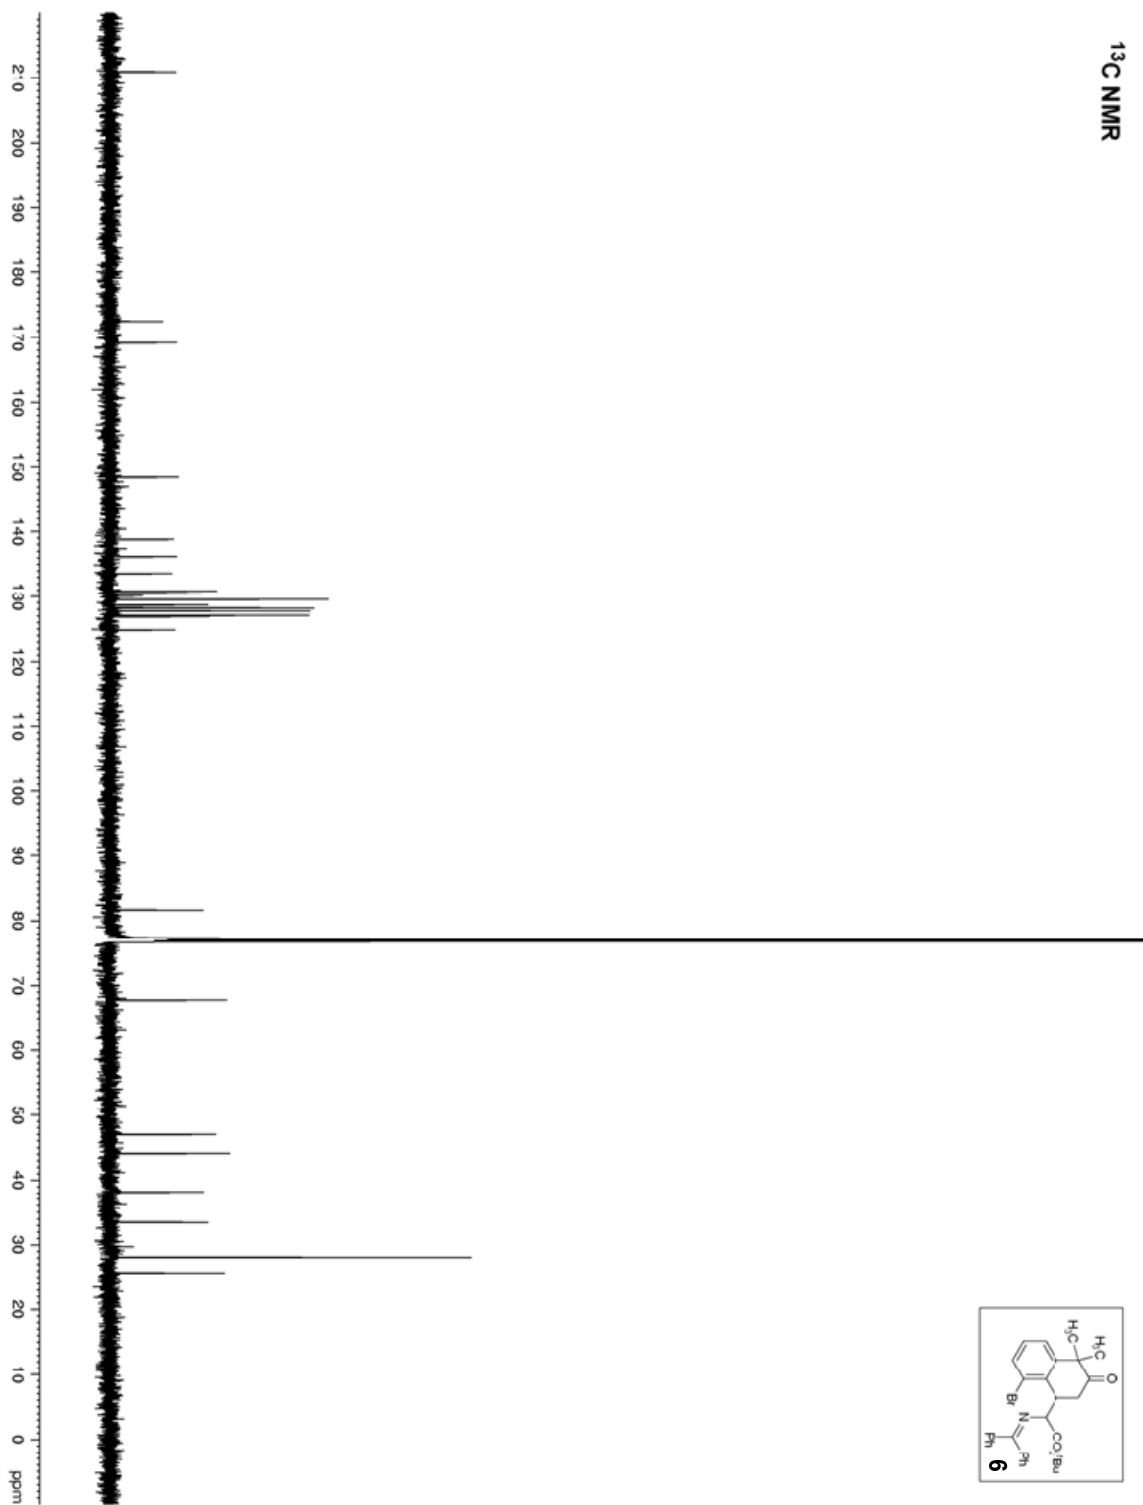

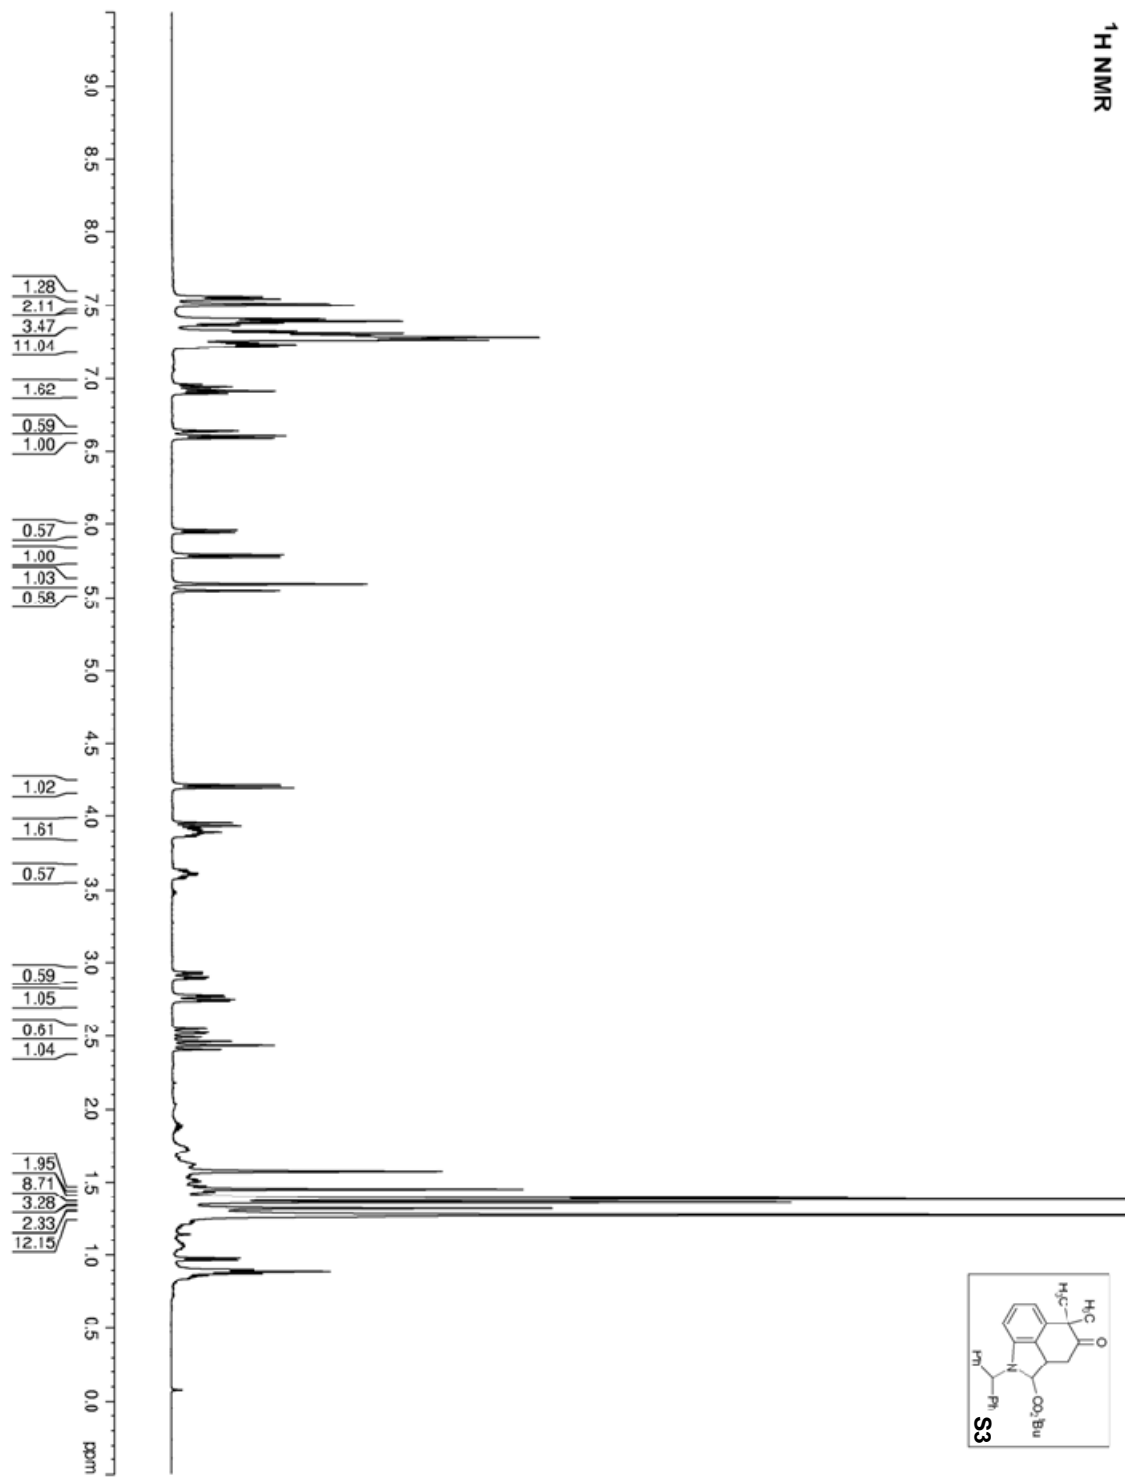

<sup>13</sup>C NMR

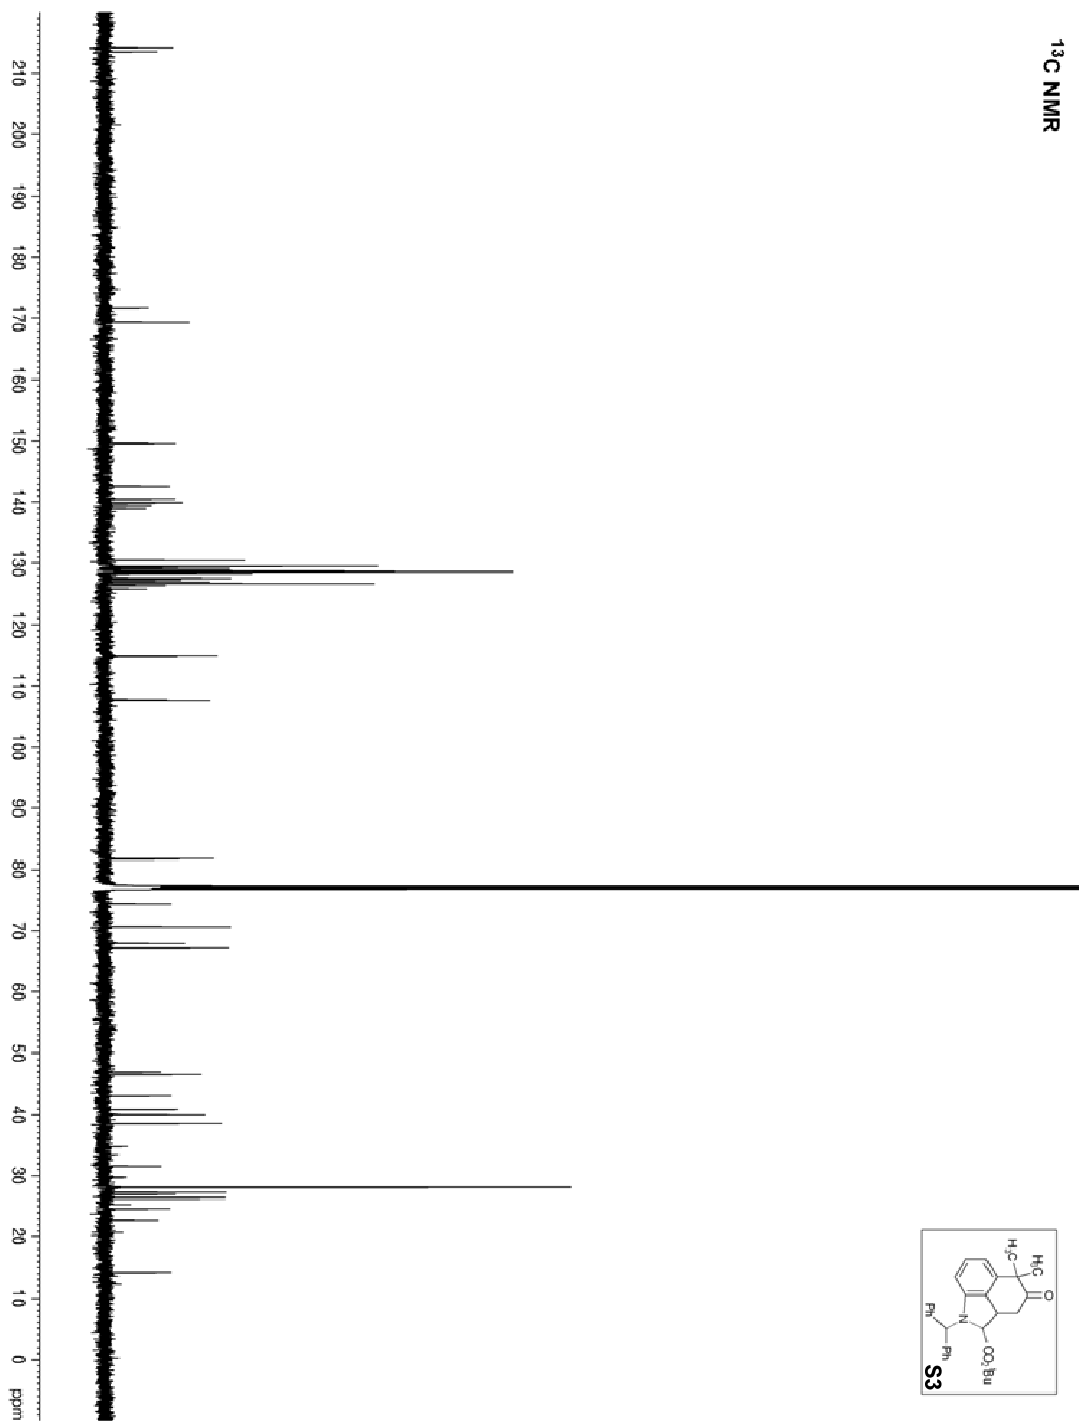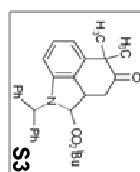

<sup>1</sup>H NMR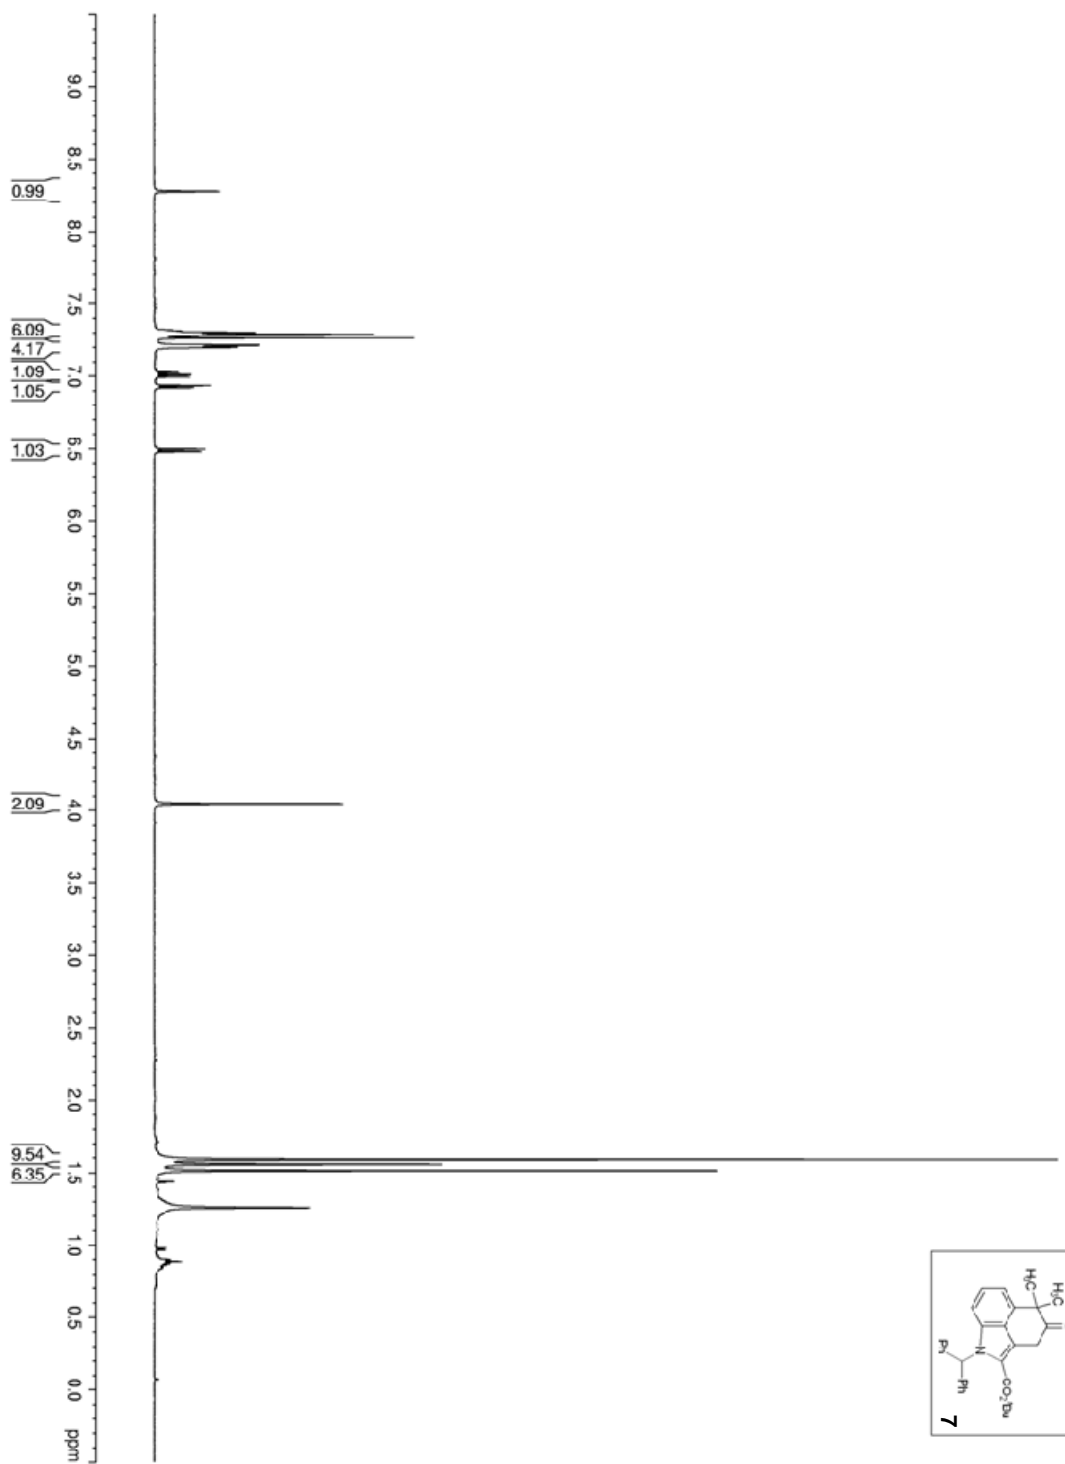

$^{13}\text{C}$  NMR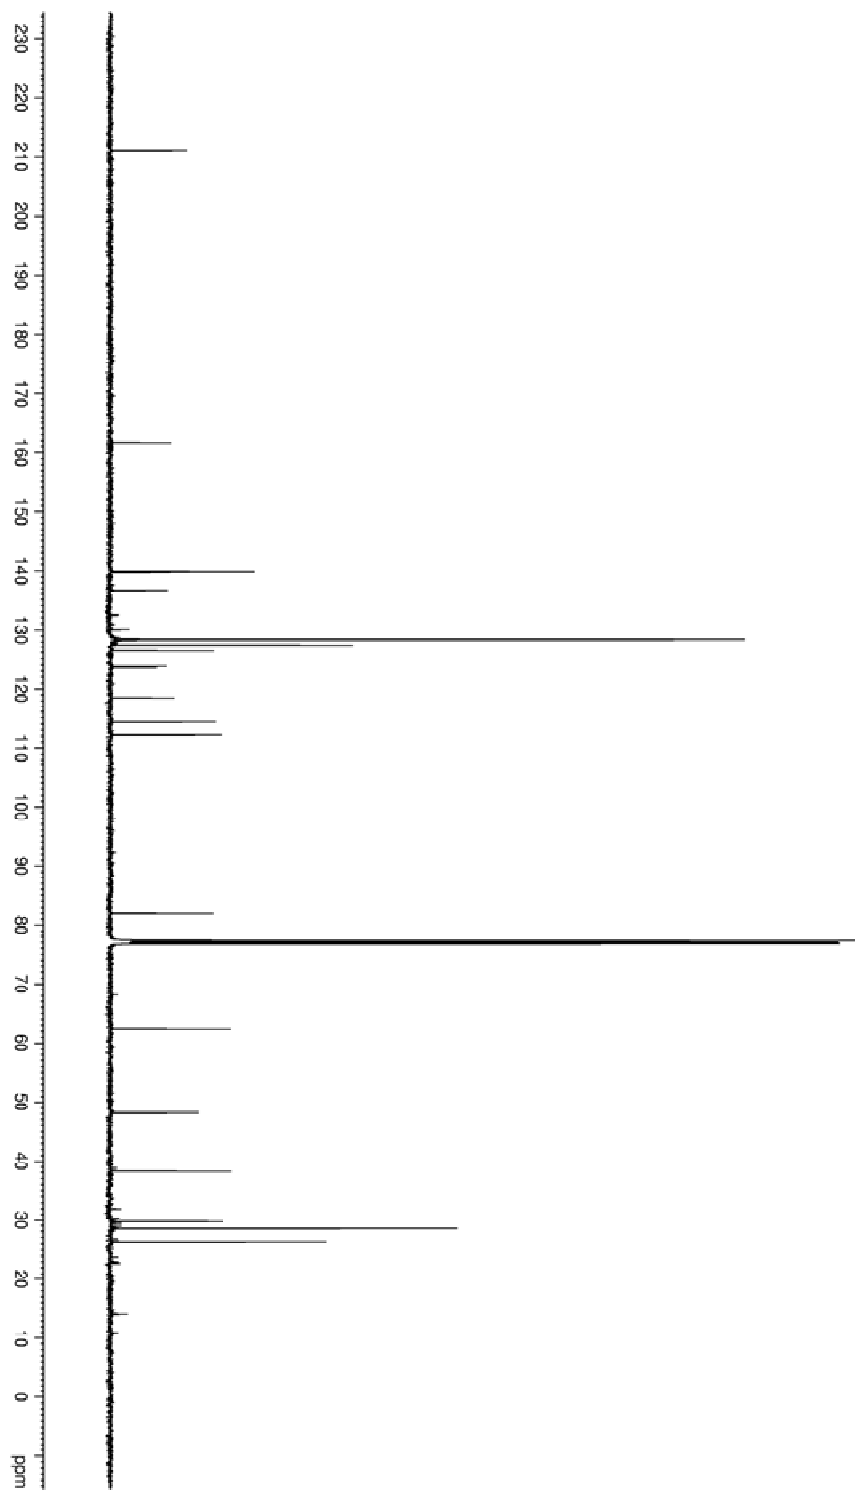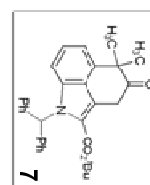

4-exp51-p2-h second spot isolated from thermal diels alder reaction

Pulse Sequence: s2pul

File: 4-exp51-p2-h

Date: Aug 29 2002

VER4.00

PULSE SEQUENCE: standard

OBSERVE: H1

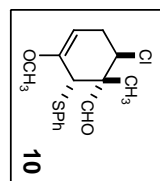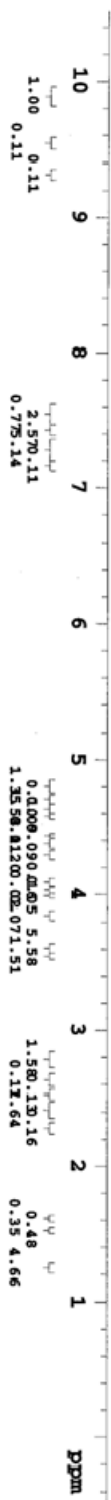

04-15-10  
Pulse Sequence: zgpg30  
Date\_ Acq: 03/20/02  
NOE  
Pulse Sequence: zgpg30  
Observer: CDS  
DECOUPLE: H1

**<sup>13</sup>C NMR**

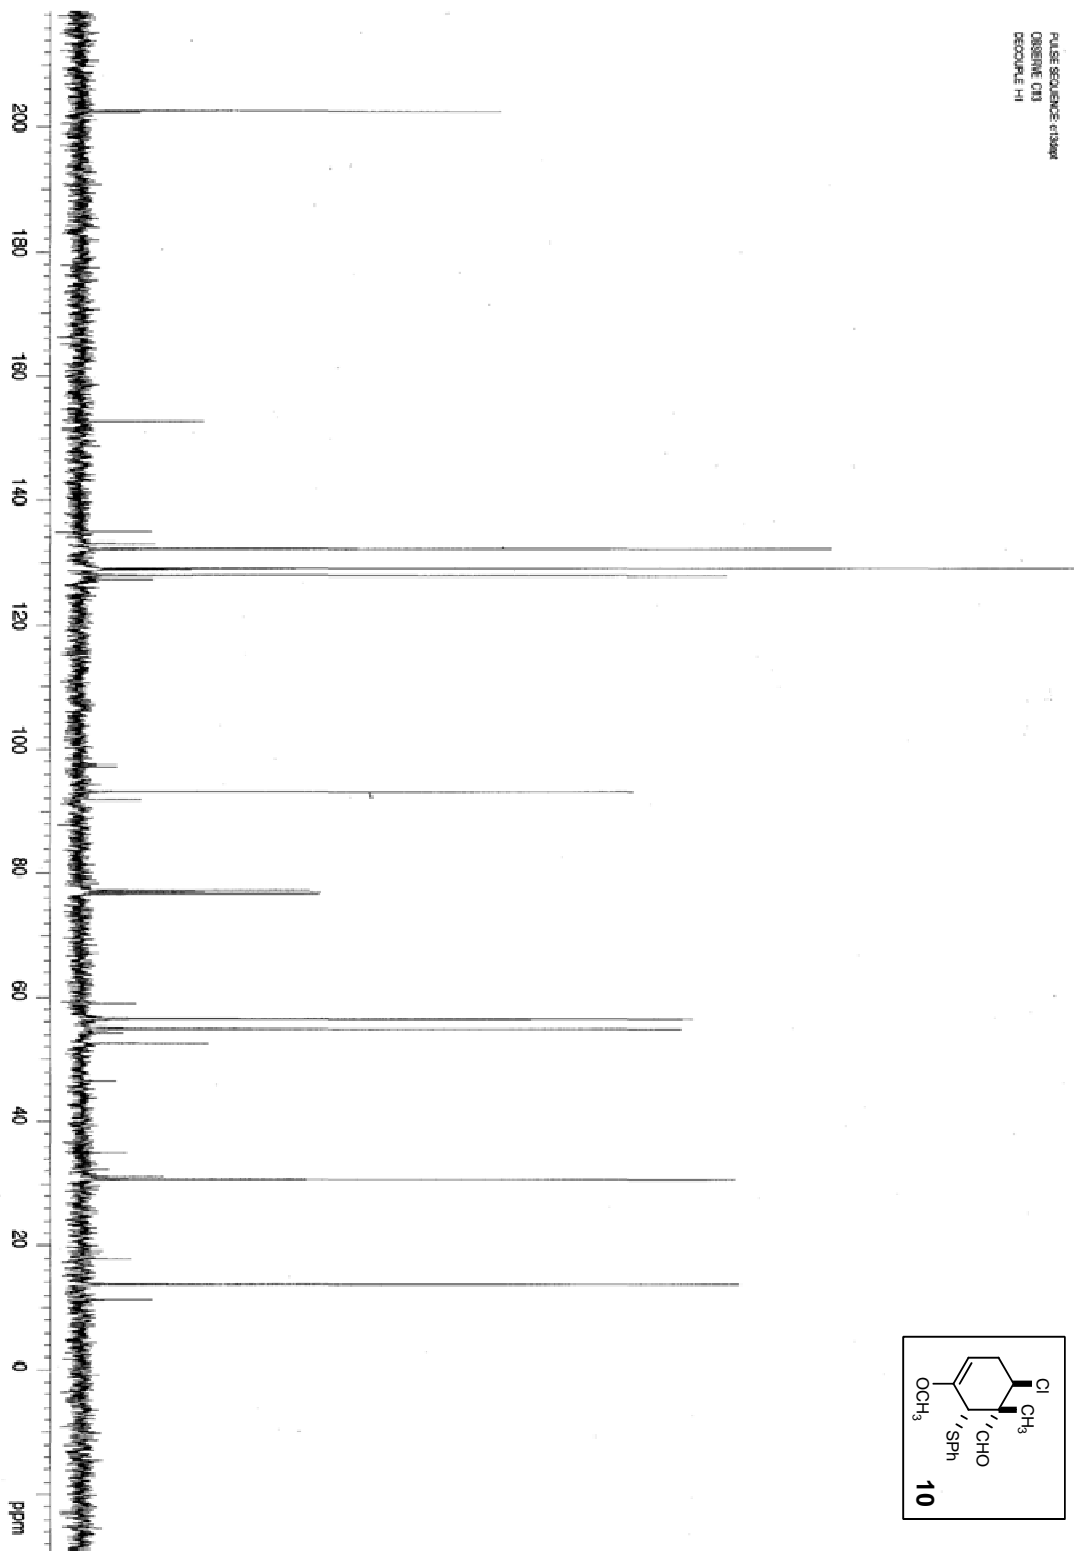



4-sample 91-nmethylvinylsiloxane glass fiber coated with waxy fluor column

**<sup>1</sup>H NMR**

File: H00027114  
 Date: Sep 4 2002  
 09:40:00  
 PULSE SEQUENCE: hmqdec  
 OBSERVE: <sup>1</sup>H

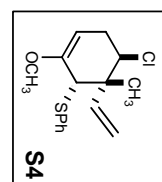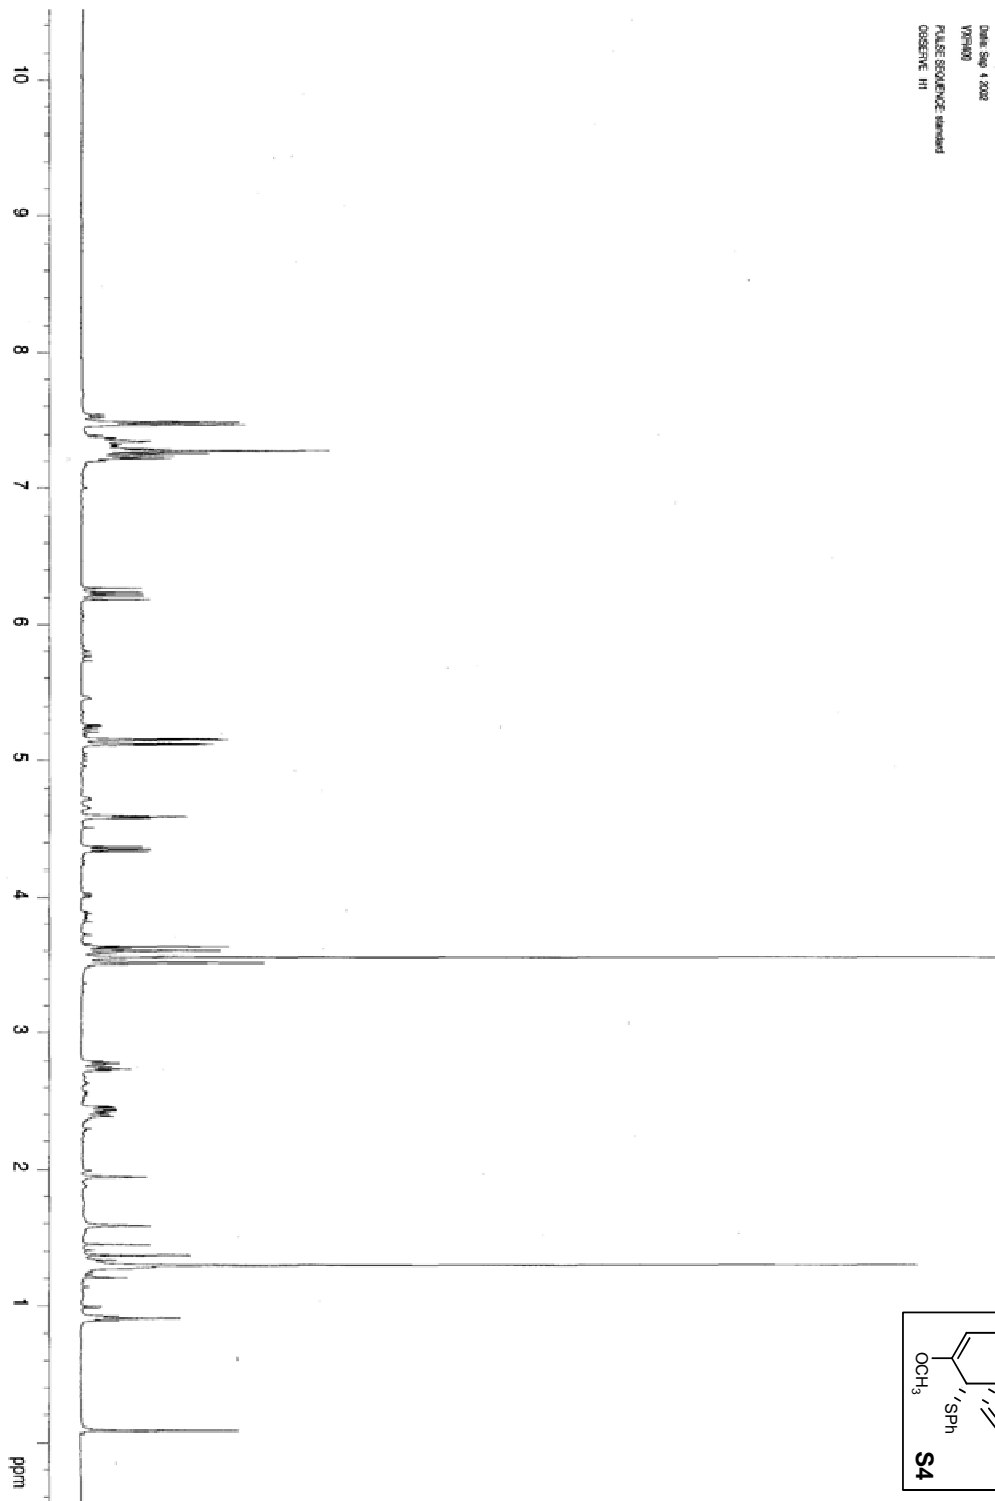

**<sup>13</sup>C NMR**

SI-4-0031-04  
 Peak Sequence: c10aaf  
 Date: Sep 4 2007  
 400  
 PULSED PROBE: c10aaf  
 QNP: 13C  
 PROC: 101

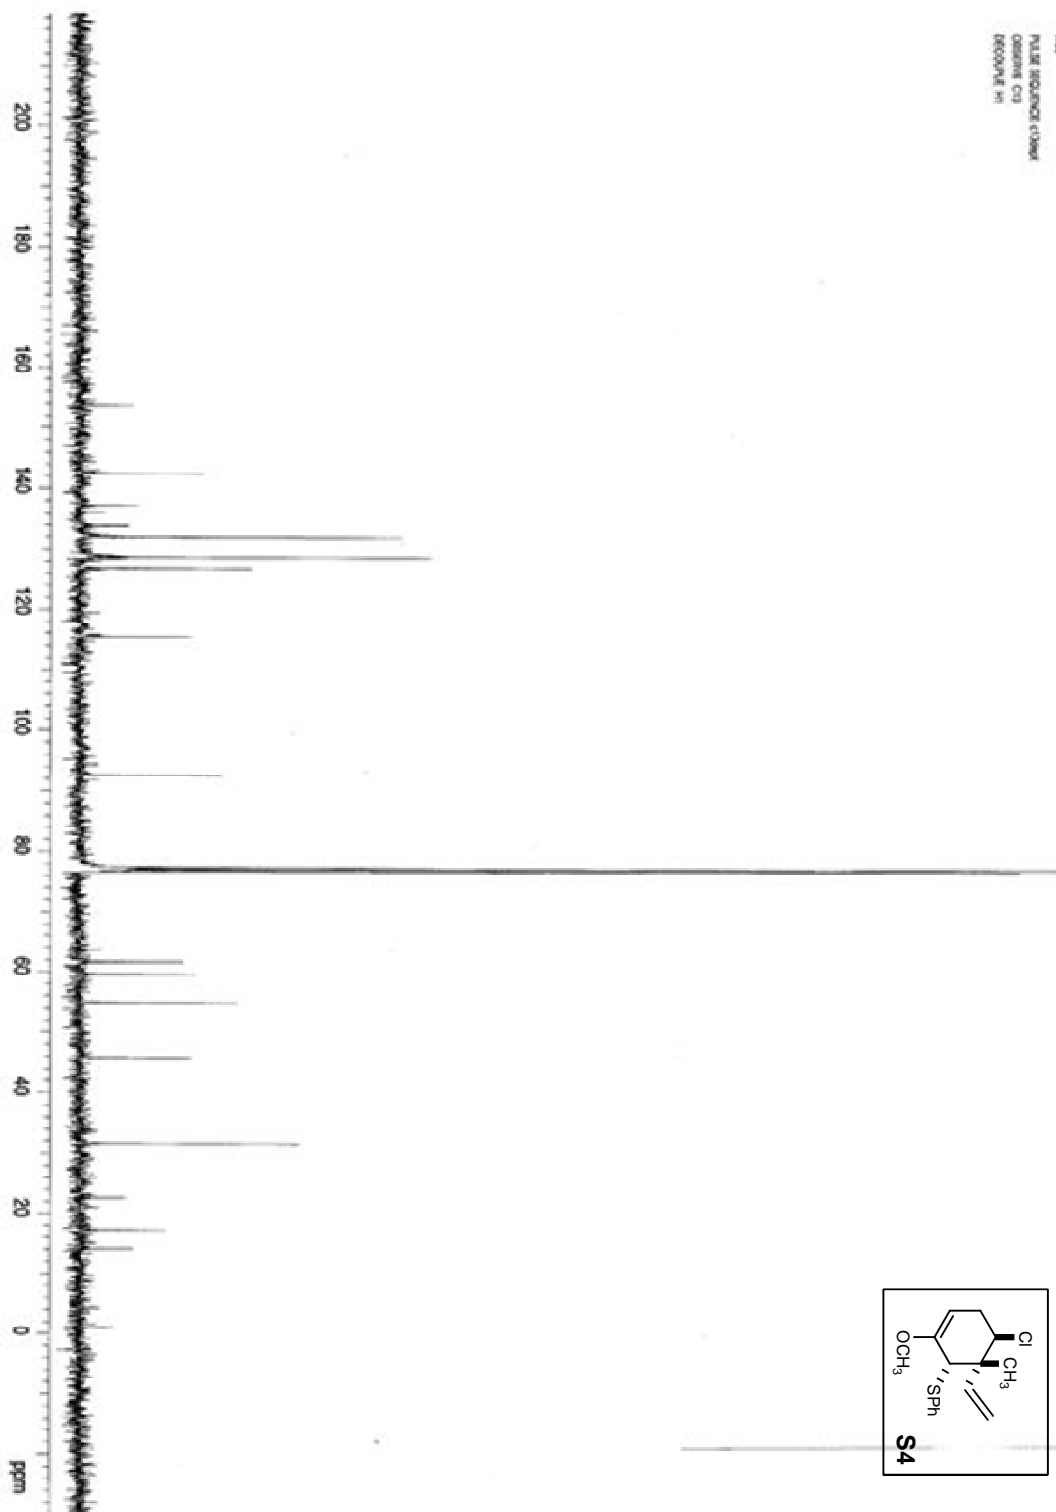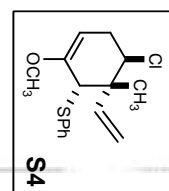

**<sup>1</sup>H NMR**

Volume after grad after cleanup and column  
Pulse Sequence: zgpg30  
Date: Nov 21 2002  
VPRH00  
PULSE SEQUENCE: zgpg30  
ORIGIN: H1

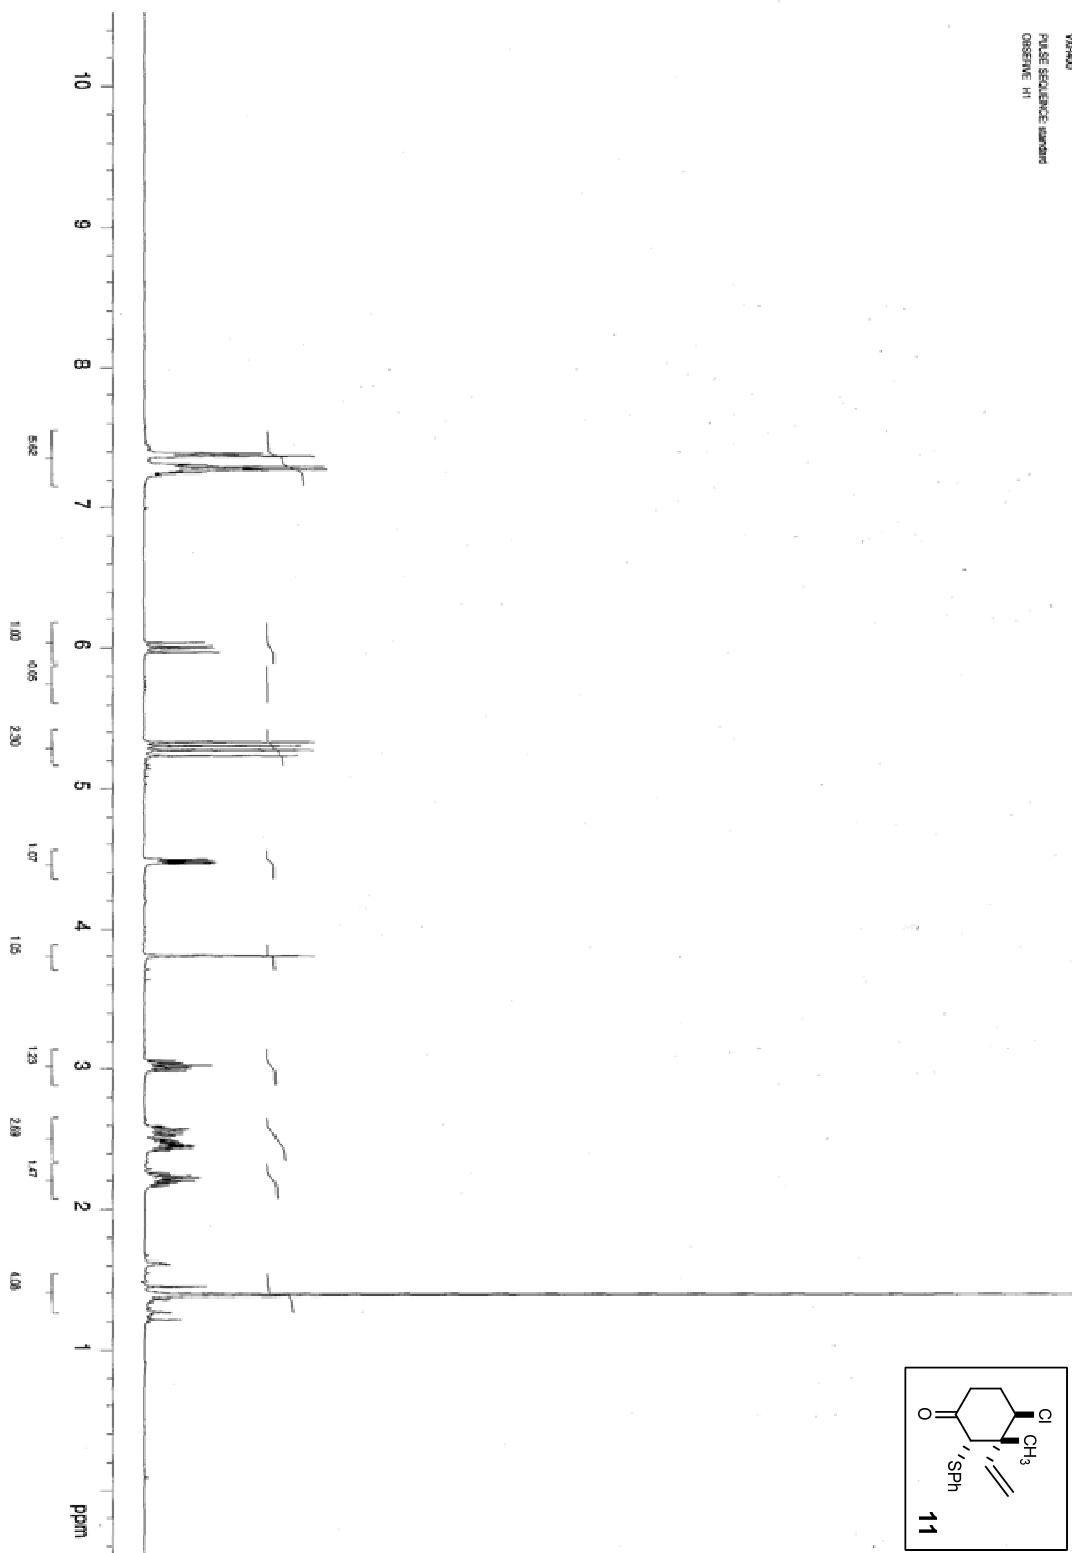

**<sup>13</sup>C NMR**

06-11-19-14  
 Pulse Sequence: zgpg30  
 Date\_Rev: 21\_2002  
 VPRX00  
 PULSE SEQUENCE: zgpg30  
 OBSERVE CH3  
 DECOUPLER H1

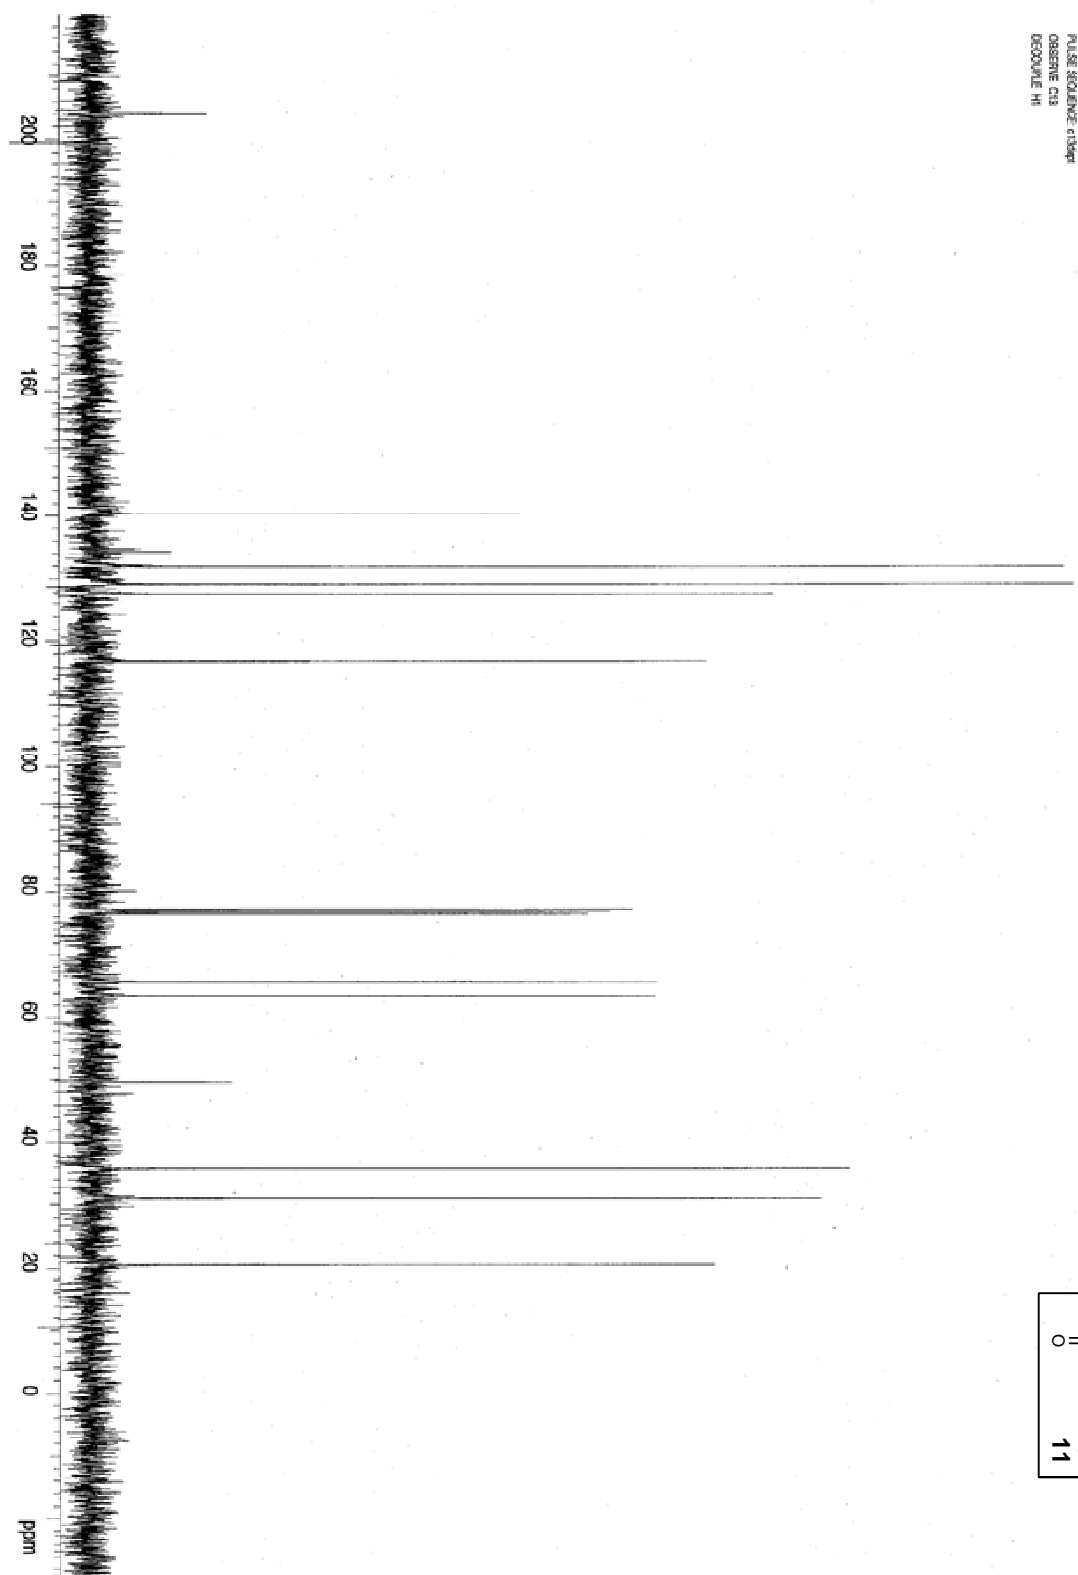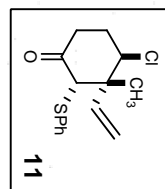

Supplement: NIHMS62894-supplement-1File002.pdf [file NIHMS62894-supplement-1File002.pdf]
